# Supplementary material for: A macrocyclic fluorescent probe for the detection of citrate
Source: Royal Society of Chemistry journal article supplement (doi:10.1039/d3ob01442h), 2023-01-01
Supplement: d3ob01442h1.pdf [file d3ob01442h1.pdf]

# A Macrocyclic Fluorescent Probe for the Detection of Citrate

## Supplementary Information

Stephen M. Butler,<sup>a,b</sup> Maria Hountondji,<sup>a,b</sup> Stuart N. Berry,<sup>a</sup> Jian Tan,<sup>c,d</sup> Laurence Macia,<sup>c,d,e</sup> and Katrina A. Jolliffe<sup>a,b,f\*</sup>

<sup>a</sup>School of Chemistry, The University of Sydney, NSW, 2006, Australia.

<sup>b</sup>Australian Research Council Centre of Excellence for Innovations in Peptide and Protein Science, The University of Sydney, 2006, NSW, Australia.

<sup>c</sup>The Charles Perkins Centre, The University of Sydney NSW 2006, Australia

<sup>d</sup>School of Medical Sciences, Faculty of Medicine and Health, The University of Sydney NSW 2006, Australia

<sup>e</sup>Sydney Cytometry, The University of Sydney NSW 2006, Australia

<sup>f</sup>The University of Sydney Nano Institute (Sydney Nano), The University of Sydney, NSW 2006, Australia.

\*[kate.jolliffe@sydney.edu.au](mailto:kate.jolliffe@sydney.edu.au)

### Table of Contents

|                                                                                                                        |           |
|------------------------------------------------------------------------------------------------------------------------|-----------|
| <b>Experimental .....</b>                                                                                              | <b>1</b>  |
| Synthesis.....                                                                                                         | 1         |
| Anion Screens.....                                                                                                     | 3         |
| Titrations .....                                                                                                       | 3         |
| Cell Studies .....                                                                                                     | 4         |
| <b>Compound Spectra .....</b>                                                                                          | <b>5</b>  |
| <b>Additional Figures.....</b>                                                                                         | <b>21</b> |
| Figure S1—DFT modelling of receptor 2 with A: adipate; B: terephthalate.....                                           | 21        |
| Figure S2—Variable temperature <sup>1</sup> H NMR.....                                                                 | 22        |
| Figure S3—Terephthalate <sup>1</sup> H NMR titration.....                                                              | 23        |
| Figure S4—Propiolate <sup>1</sup> H NMR titration.....                                                                 | 24        |
| Figure S5—Malonate <sup>1</sup> H NMR titration .....                                                                  | 25        |
| Figure S6—Screening data: all anions .....                                                                             | 26        |
| Figure S7—Excitation/emission spectrum of receptor 2.....                                                              | 27        |
| Figure S8—Fluorescence titration of receptor 2 (25 μM) with citrate in 9:1 CH <sub>2</sub> Cl <sub>2</sub> /MeOH ..... | 28        |
| Figure S9—Deprotonation of receptor 2 (25 μM) in DMSO .....                                                            | 29        |
| Figure S10—UV/Vis titration of receptor 2 (25 μM) with citrate in 9:1 DMSO/H <sub>2</sub> O .....                      | 31        |
| Figure S11 – Representative UV-vis titrations of receptor 2 (25 μM) with carboxylates .....                            | 33        |
| Figure S12—Spectral Signature of Receptor 2 .....                                                                      | 40        |



## Experimental

### Synthesis

#### General synthesis of tetrabutylammonium carboxylates

Carboxylic acid (1eq, ~100 mg) was dissolved in water (5 mL) at room temperature. A solution of tetrabutylammonium hydroxide (2 or 3 equivalents, 1M in methanol) was added dropwise with stirring. The resulting solution was stirred at room temperature for half an hour. The methanol was removed *in vacuo*, and the remaining aqueous solution lyophilized until a dry solid was obtained. Salts were stored in a vacuum dessicator at room temperature, or under nitrogen atmosphere at -20 °C (oxalate, malonate, succinate) and were lyophilized prior to use.

#### Tetrabutylammonium oxalate

<sup>1</sup>H NMR (300 MHz, DMSO-*d*<sub>6</sub>) δ 3.22 – 3.09 (m, 16H), 1.65 – 1.48 (m, 16H), 1.38 – 1.23 (m, 16H), 0.93 (t, *J* = 7.3 Hz, 24H).

#### Tetrabutylammonium malonate

<sup>1</sup>H NMR (300 MHz, MeCN-*d*<sub>3</sub>) δ 3.14 – 3.06 (m, 16H), 2.70 (s, 2H), 1.67 – 1.54 (m, 16H), 1.42 – 1.29 (m, 16H), 0.97 (t, *J* = 7.3 Hz, 24H).

#### Tetrabutylammonium succinate

<sup>1</sup>H NMR (300 MHz, DMSO-*d*<sub>6</sub>) δ 3.26 – 3.12 (m, 16H), 1.89 (s, 4H), 1.65 – 1.49 (m, 16H), 1.40 – 1.23 (m, 16H), 0.93 (t, *J* = 7.3 Hz).

#### Tetrabutylammonium terephthalate

<sup>1</sup>H NMR (300 MHz, DMSO-*d*<sub>6</sub>) δ 7.64 (s, 4H), 3.26 – 3.12 (m, 16H), 1.65 – 1.49 (m, 16H), 1.40 – 1.23 (m, 16H), 0.93 (t, *J* = 7.3 Hz).

#### Tetrabutylammonium citrate

<sup>1</sup>H NMR (300 MHz, DMSO-*d*<sub>6</sub>) δ 3.22 – 3.09 (m, 24H), 2.29 (d, *J* = 14 Hz, 2H), 1.98 (d, *J* = 14 Hz, 2H), 1.65 – 1.48 (m, 24H), 1.38 – 1.23 (m, 24H), 0.93 (t, *J* = 7.3 Hz, 36H).

#### *tert*-Butyl (3-(aminomethyl)benzyl)carbamate (4)

A solution of di-*tert*-butyl dicarbonate (819 mg, 3.75 mmol) in dichloromethane (10 mL) was added dropwise over a period of five minutes to a solution of freshly-distilled *m*-xyleneamine (2.5 mL, 18.9 mmol) in dichloromethane at 0 °C. The resulting mixture was allowed to warm to room temperature overnight (14h). Water was added, and the aqueous phase extracted with dichloromethane. The combined organic phases were washed repeatedly with water until TLC analysis showed no starting

diamine remaining. The organic phase was washed with brine (x1), dried (Na<sub>2</sub>SO<sub>4</sub>), and the solvent removed *in vacuo* to afford the title compound as a clear oil that solidified upon standing (835 mg, 94%), with all analytical data matching that previously reported in the literature.<sup>1</sup>

<sup>1</sup>H NMR (300 MHz, CDCl<sub>3</sub>) δ 7.30 (t, *J* = 7.3 Hz, 1H), 7.25 – 7.13 (m, 3H), 4.84, (s, 1H), 4.31 (d, *J* = 5.7 Hz, 2H), 3.90 (s, 2H), 1.46 (s, 9H).

#### ***tert*-Butyl (3-(isothiocyanatomethyl)benzyl)carbamate (6)**

Thiophosgene (180 μL, 2.35 mmol) was added dropwise to a mixture of *tert*-butyl (3-(aminomethyl)benzyl)carbamate (**5**) (371 mg, 1.57) in dichloromethane (80 mL) and saturated aqueous NaHCO<sub>3</sub> solution (16 mL) at room temperature. The resulting mixture was stirred at room temperature for 1 h. The reaction mixture was extracted with dichloromethane (x3), and the organic extracts combined, washed with brine, and dried (Na<sub>2</sub>SO<sub>4</sub>). Removal of the solvent *in vacuo* afforded the title compound as an off-white solid (437 mg, *quant.*) that was used in following steps without further purification. All analytical data matched that previously reported in the literature.<sup>2</sup>

<sup>1</sup>H NMR (300 MHz, CDCl<sub>3</sub>) δ 7.36 (t, *J* = 7.8 Hz, 1H), 7.29 – 7.19 (m, 3H), 4.88 (s, 1H), 4.81 (s, 2H), 4.33 (d, *J* = 5.7 Hz, 2H), 1.47 (s, 9H).

#### **Di-*tert*-butyl (((((thiocarbonylbis(azanediyl)))bis(methylene)))bis(3,1-phenylene))bis(methylene))dicarbamate (7)**

A solution of amine **4** (370 mg, 1.57 mmol) in dichloromethane (10 mL) was added to a solution of thioisocyanate **6** (437 mg, 1.57 mmol) in dichloromethane (10 mL) at room temperature. The resulting solution was stirred at room temperature for 16 h. The solvent was removed *in vacuo* to afford the title compound as a white foam (807 mg, *quant.*), with all analytical data matching that previously reported in the literature.<sup>3</sup>

<sup>1</sup>H NMR (300 MHz, CDCl<sub>3</sub>) δ 7.29 (t, *J* = 7.8 Hz, 2H), 7.23 – 7.10 (m, 6H), 6.13 (s, 2H), 4.96 (s, 2H), 4.63 (d, *J* = 4.5 Hz, 4H), 4.25 (d, *J* = 5.5 Hz, 4H), 1.45 (s, 18H); <sup>13</sup>C NMR (125 MHz, CDCl<sub>3</sub>) δ 182.7, 156.3, 139.5, 138.1, 129.1, 126.8, 126.7, 126.6, 79.9, 48.5, 44.4, 28.5; HRMS (ESI) Calc. for C<sub>27</sub>H<sub>28</sub>N<sub>4</sub>O<sub>4</sub>SNa (MNa<sup>+</sup>) 537.2506 found 537.2503; IR (ATIR, neat) 3348, 2979, 1686, 1523, 1249, 1163, 698 cm<sup>-1</sup>.

#### **3,6-Dichloro-1,8-diisothiocyanato-9*H*-carbazole (5)**

Thiophosgene (250 μL, 3.26 mmol) was added dropwise to a mixture of carbazole diamine **3** (287 mg, 1.08 mmol) in ethyl acetate (22 mL) and saturated aqueous NaHCO<sub>3</sub> solution (11 mL) at room temperature. The resulting mixture was stirred at room temperature for a further 30 mins. The aqueous phase was extracted with ethyl acetate (x3) and with dichloromethane (x3). The combined organic phases were each washed with brine, dried (Na<sub>2</sub>SO<sub>4</sub>), and the solvent removed *in vacuo* to afford the title compound as a brown solid (378 mg, *quant.*).

<sup>1</sup>H NMR (300 MHz, CDCl<sub>3</sub>) δ 8.56 (s, 1H), 7.87 (s, 2H), 7.39 (s, 2H); <sup>13</sup>C NMR (125 MHz, CDCl<sub>3</sub>) δ 135.8, 133.5, 125.5, 124.5, 124.0, 120.7, 115.3; HRMS (ESI) Calc. for C<sub>14</sub>H<sub>4</sub>Cl<sub>2</sub>N<sub>3</sub>S<sub>2</sub> (M<sup>+</sup>) 347.9229 found 347.9221; IR (ATIR, neat) 3330, 2010, 1253, 1227, 850, 578 cm<sup>-1</sup>.

**6<sup>3</sup>,6<sup>6</sup>-dichloro-6<sup>9</sup>H-3,5,7,9,13,15-hexaaza-6(1,8)-carbazola-1,11(1,3)-dibenzenacyclohexadecaphane-4,8,14-trithione (2)**

TFA (2 mL) was added dropwise to a solution of di-Boc-protected diamine **7** (179 mg, 0.348 mmol) in dichloromethane (5 mL) at room temperature. The resulting solution was stirred at room temperature for a further 2 h, at which point the solvent was removed under a flow of nitrogen. The free base of the amine was obtained by passing the compound through Amberlyst A-26(OH) resin, eluting with methanol. Due to limited stability of this compound it was carried through directly to the following step.

The intermediate diamine (0.348 mmol) was dissolved in a mixture of dichloromethane (14 mL) and acetonitrile (5 mL), and added dropwise over 20 mins to a solution of diisothiocyanate **5** (125 mg, 0.357 mmol) and DIPEA (300  $\mu$ L, 1.72 mmol) in dichloromethane (140 mL) at room temperature. The resulting mixture was stirred at room temperature for 24 h. The solvent was removed *in vacuo*. Flash column chromatography, eluting with 10% THF/90% dichloromethane, afforded the title compound as an off-white solid (84 mg, 38%).

<sup>1</sup>H NMR (300 MHz, DMSO-*d*<sub>6</sub>)  $\delta$  10.93 (s, 1H), 9.65 (s, 2H), 8.22 – 8.02 (m, 4H), 7.93 (s, 2H), 7.63 (s, 2H), 7.37 – 7.10 (m, 8H), 4.83 – 4.53 (m, 8H); HRMS (ESI) Calc. for C<sub>31</sub>H<sub>28</sub>Cl<sub>2</sub>N<sub>3</sub>S<sub>3</sub> (M + H)<sup>+</sup> 644.0940 found 644.0935; IR (ATIR, neat) 3257, 2923, 2854, 1532, 1294, 1225, 694 cm<sup>-1</sup>. Attempts to obtain full NMR characterization of MThua were hindered by limited solubility of the compound, and broadening of NMR peaks due to conformational flexibility. Hence, the <sup>13</sup>C NMR spectrum was obtained in the presence of an excess of (TBA)<sub>2</sub>HPO<sub>4</sub>. <sup>1</sup>H NMR (phosphate-bound)(300 MHz, DMSO-*d*<sub>6</sub>)  $\delta$  9.08 (s, 2H), 7.81 (s, 4H), 7.30 – 7.15 (m, 8H), 4.72 (s, 4H), 4.67 (s, 4H); <sup>13</sup>C NMR (phosphate-bound)(125 MHz, DMSO-*d*<sub>6</sub>)  $\delta$  183.3 (very broad, observed in HMBC spectrum), 180.7, 139.5, 138.6, 130.7, 128.4, 128.1, 127.3, 127.1, 127.0, 123.4, 122.7, 115.9, 113.7, 48.7, 48.3.

### Anion Screens

Anion screens were performed as follows. A 25  $\mu$ M stock solution of receptor **2** in the specified solvent mixture (40 – 50 mL) was prepared. A “blank” spectrum with no added anion was recorded using this solution. All anions used were anhydrous tetrabutylammonium salts, with the exceptions of tetraethylammonium bicarbonate and tetrabutylammonium fluoride trihydrate. Anions used were obtained from commercial sources or prepared according to literature methods. Hygroscopic salts were lyophilized prior to use. Anions were weighed into separate vials, and diluted with 1 – 3 mL of the receptor **2** stock solution, such that the solution contained 100 equivalents of anion relative to receptor **2**. Spectra of each mixture were recorded using the same cuvette, which was thoroughly cleaned and dried between each use. Spectra were recorded on a Horiba Duetta spectrophotometer with temperature control enabled (25 °C) using 10 mm quartz cuvettes.

### Titration

Anion titrations were performed as follows. A 25  $\mu$ M stock solution of receptor **2** in the specified solvent mixture (40 – 50 mL) was prepared. A “blank” spectrum with no added anion was recorded using this solution. All anions used were anhydrous tetrabutylammonium salts, with the exceptions of tetraethylammonium bicarbonate and tetrabutylammonium fluoride trihydrate. Anions used were obtained from commercial sources or prepared according to literature methods. Hygroscopic salts were lyophilized prior to use. Anions were weighed into separate vials, and diluted with 0.5 – 1.5 mL of the receptor **2** stock solution, such that the solution contained 5 – 10 mM anion. Small measured aliquots were added to the receptor **2** stock solution, and the solution stirred for at least 30 seconds before the acquisition of a spectrum. Fluorescence spectra were recorded on a Horiba Duetta spectrophotometer with temperature control enabled (25 °C) using 10 mm quartz cuvettes.

Absorption spectra were obtained in the specified solvent on a Varian Cary 400 UV-Vis spectrophotometer using 10 mm quartz cuvettes.

### Cell Studies

Cell staining was achieved by prior fixation and permeabilization of splenocytes using the eBioscience™ Foxp3 / Transcription Factor Staining Buffer Set, followed by incubation of receptor **2** for 20 minutes at room temperature. Evaluation of metabolic activity and associated changes to intracellular citrate level was determined using murine macrophages. Splenocyte-derived macrophages were first activated for 1 hour with lipopolysaccharides (LPS), LPS and oligomycin, or with PBS only. The macrophages were harvested, then permeabilized and incubated with receptor **2**. Analysis of different immune cell subsets isolated from murine spleens was achieved using receptor **2**, including plasmacytoid dendritic cell (MHCII<sup>+</sup>B220<sup>+</sup>CD11c<sup>+</sup>), conventional dendritic cells (MHCII<sup>+</sup>CD11c<sup>+</sup>), macrophages (CD11b<sup>+</sup>F4/80<sup>+</sup>), monocytes (Ly6C<sup>int/high</sup>), gamma delta T cell (CD3<sup>+</sup>gdTCR<sup>+</sup>), neutrophil (CD11b<sup>+</sup>Ly6G<sup>+</sup>), conventional (CD3<sup>+</sup> and CD4<sup>+</sup>/CD8<sup>+</sup>) and regulatory T cells (CD3<sup>+</sup>CD4<sup>+</sup>CD25<sup>+</sup>FoxP3<sup>+</sup>) as well as B cells (B220<sup>+</sup>). Splenocytes were obtained by mechanical disruption followed by filtration through a 100um cell strainer to obtain a single-cell suspension. Red blood cells were then removed using RBC lysis buffer (BioLegend). Samples were resuspended in FACS buffer (2% FBS containing 1mM EDTA) for antibody staining. Briefly, cells were first stained with TruStain FcX anti-CD16/32 (93) for non-specific antibody blocking and LIVE/DEAD Fixable Blue Dead Cell Stain (Invitrogen) for dead cell exclusion. The following anti-mouse antibodies were used for the identification of various immune subsets: CD45-BV785 (30-F11), MHCII-BV510 (M5/114.15.2), B220-BUV737 (RA3-6B2), CD3-PE-CF594 (145-2C11), TCRgd-PE/Cy5 (GL3), CD4-PerCP (RM4-5), CD8-BV785 (53-6.7), CD25-BV605 (PC61), FoxP3-APC (REA788), CD11c-FITC (N418), Ly6C-BV605 (HK1.4), Ly6C-BV421 (AL-21), Ly6G-BV650 (1A8), F4/80-BV711 (BM8), CD11b-APC/Cy7 (M1/70). For detection of intracellular targets, cells were fixed and permeabilized using the eBioscience™ Foxp3 / Transcription Factor Staining Buffer Set according to the manufacturer's instructions. All samples were acquired using the LSRII 5L (BD Bioscience) flow cytometer and analysed using the FlowJo v10 software.

# Compound Spectra

***tert*-Butyl (3-(aminomethyl)benzyl)carbamate (4) – 300 MHz, CDCl<sub>3</sub>**

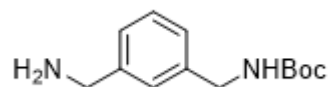

7.325  
7.301  
7.276  
7.260  
7.226  
7.192  
7.175  
7.150

4.835

4.321  
4.301

3.896

1.462

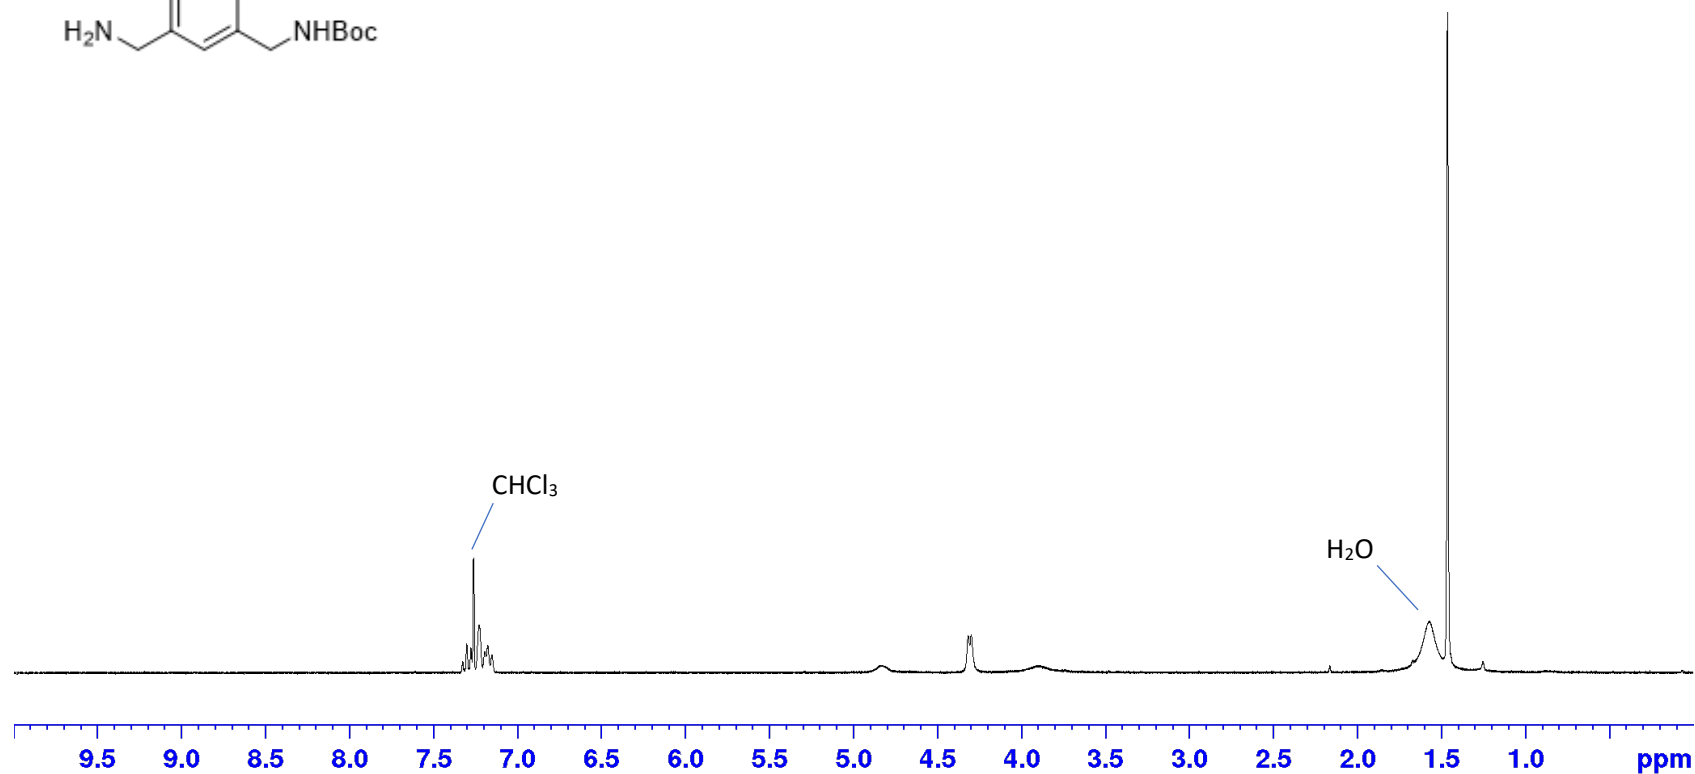

***tert*-Butyl (3-(isothiocyanatomethyl)benzyl)carbamate (6) – 300 MHz, CDCl<sub>3</sub>**

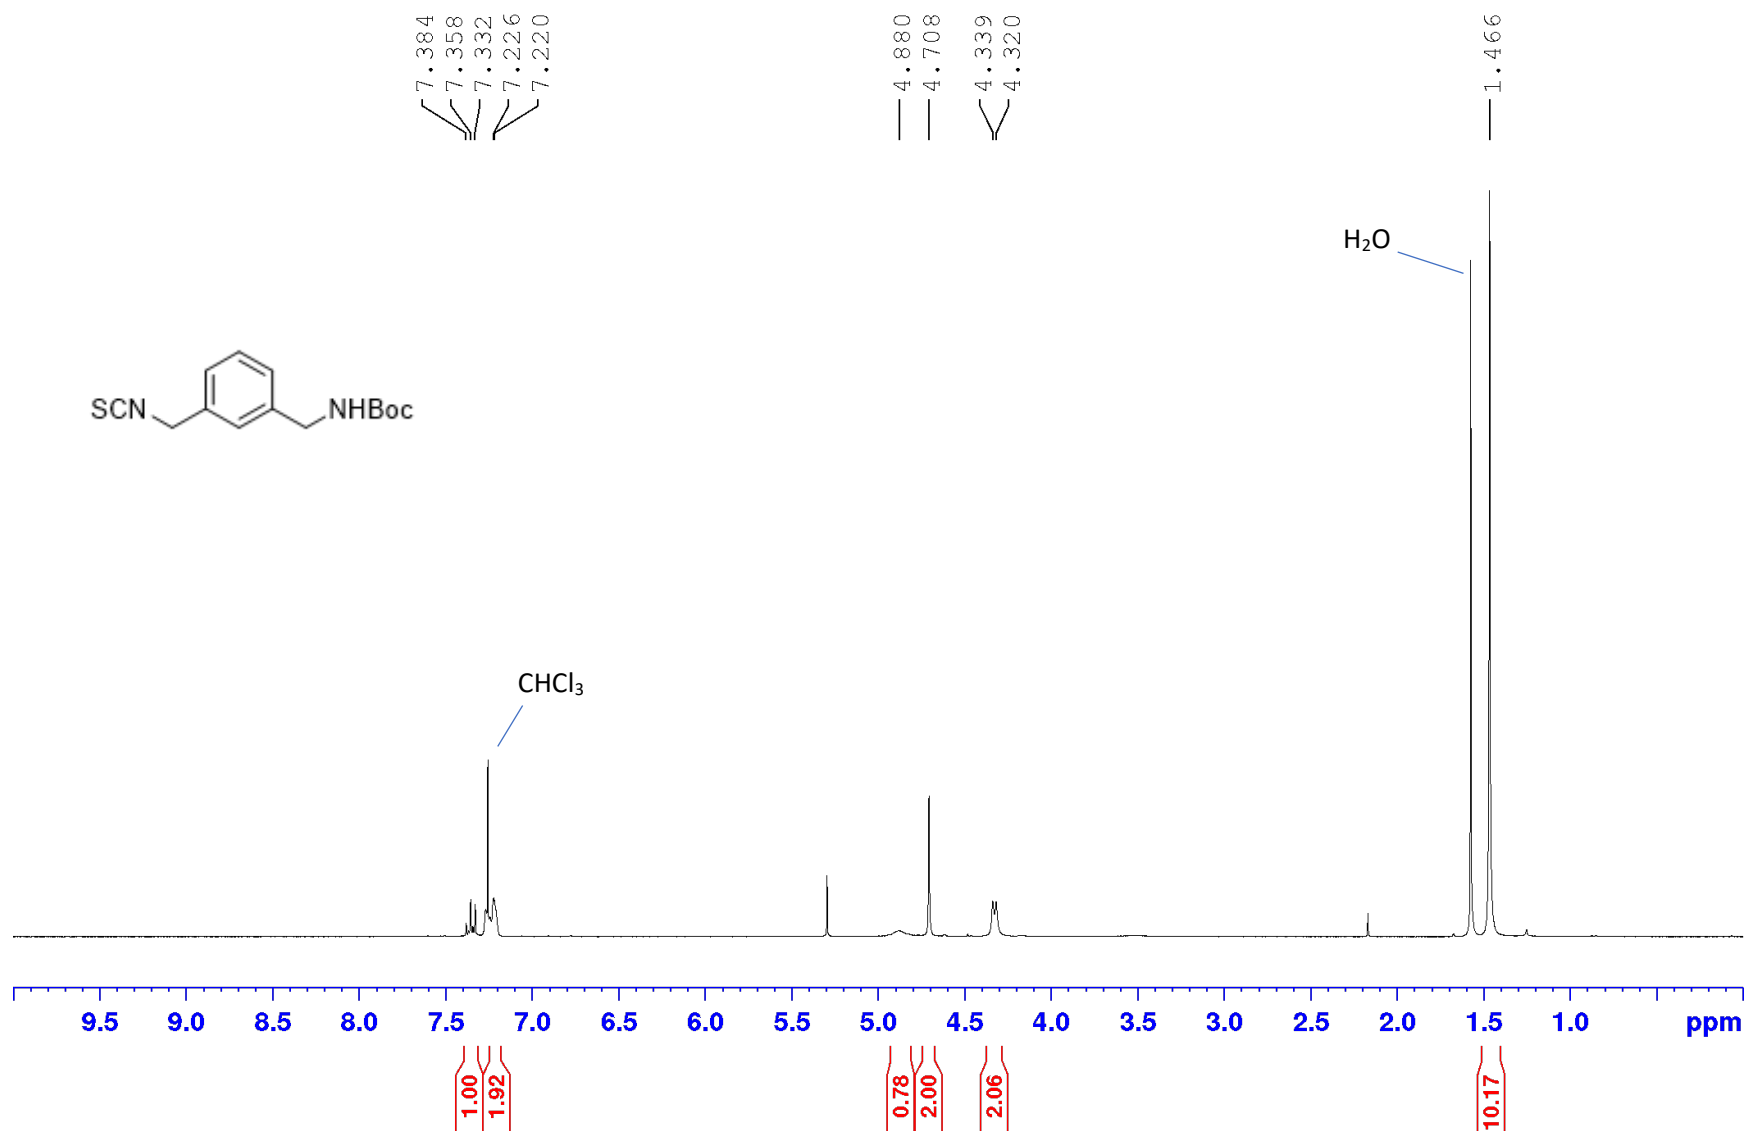

Di-*tert*-butyl (((thiocarbonylbis(azanediyl))bis(methylene))bis(3,1-phenylene))bis(methylene)dicarbamate (7) – 300 MHz, CDCl<sub>3</sub>

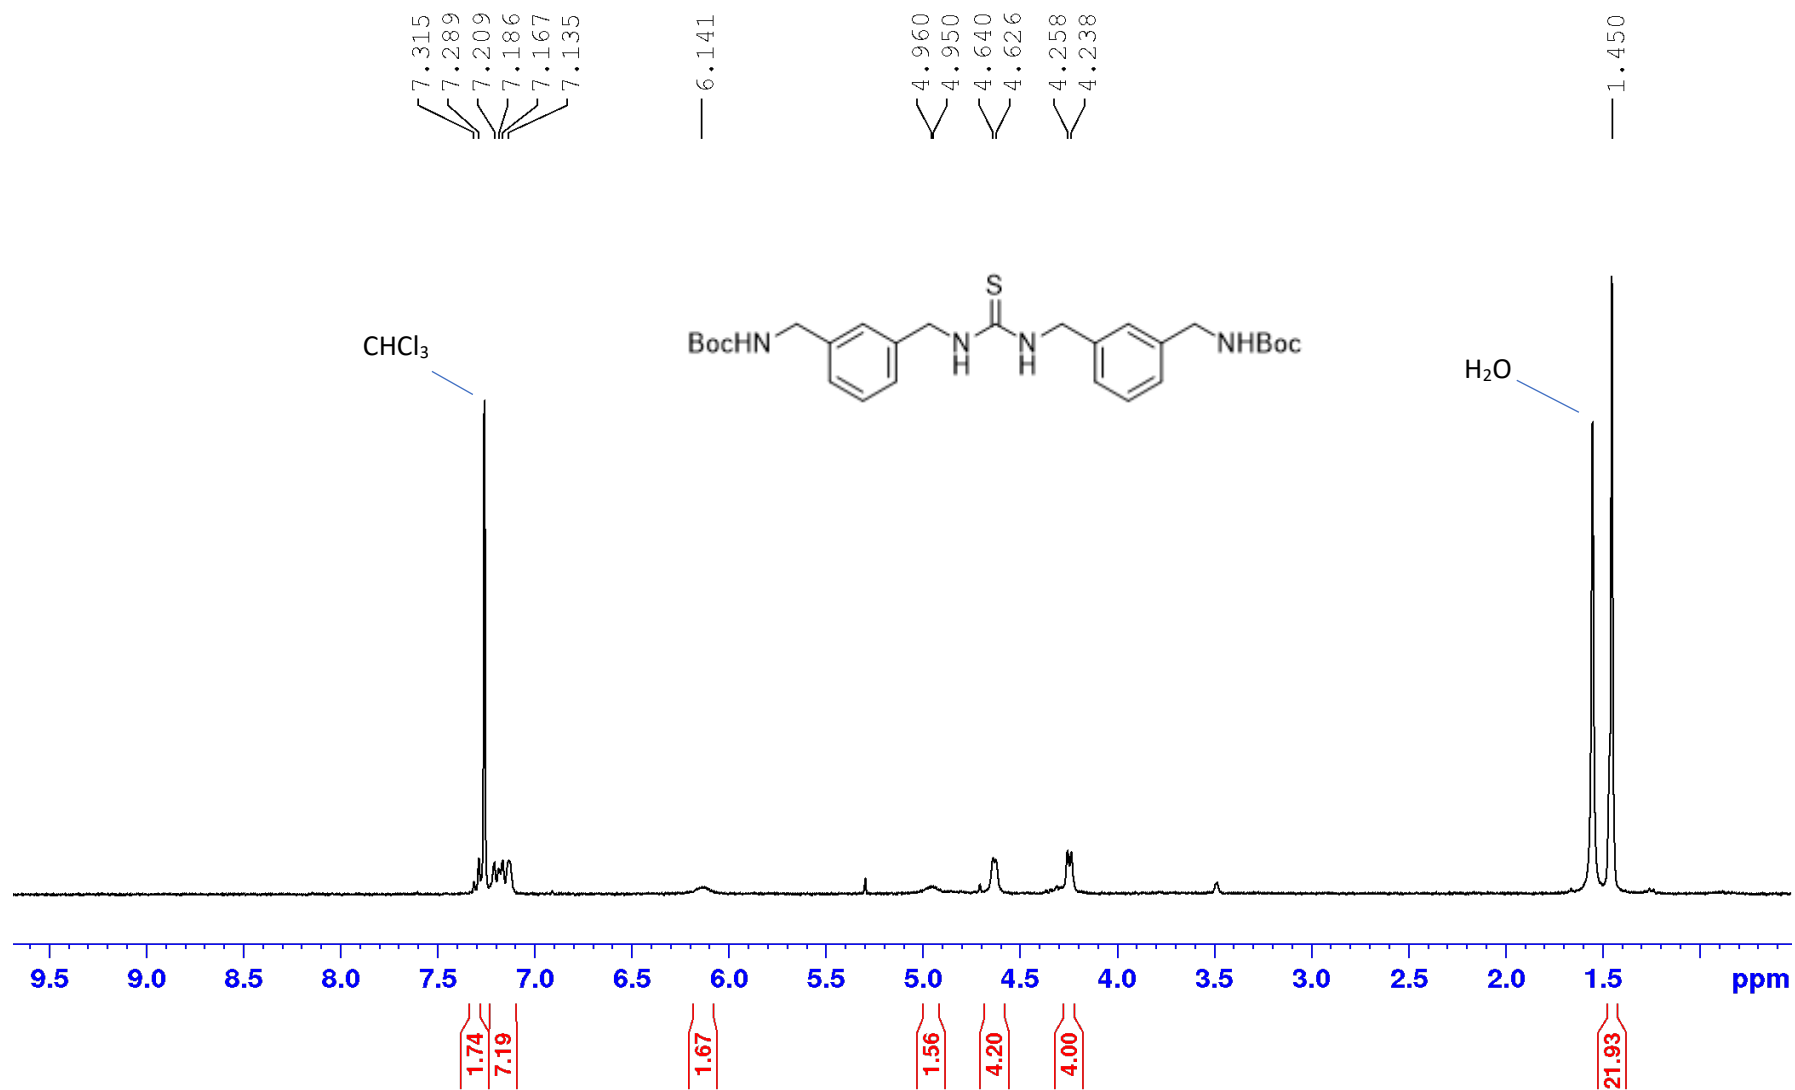

Di-*tert*-butyl (((thiocarbonylbis(azanediyl))bis(methylene))bis(3,1-phenylene))bis(methylene))dicarbamate (7) – 125 MHz, CDCl<sub>3</sub>

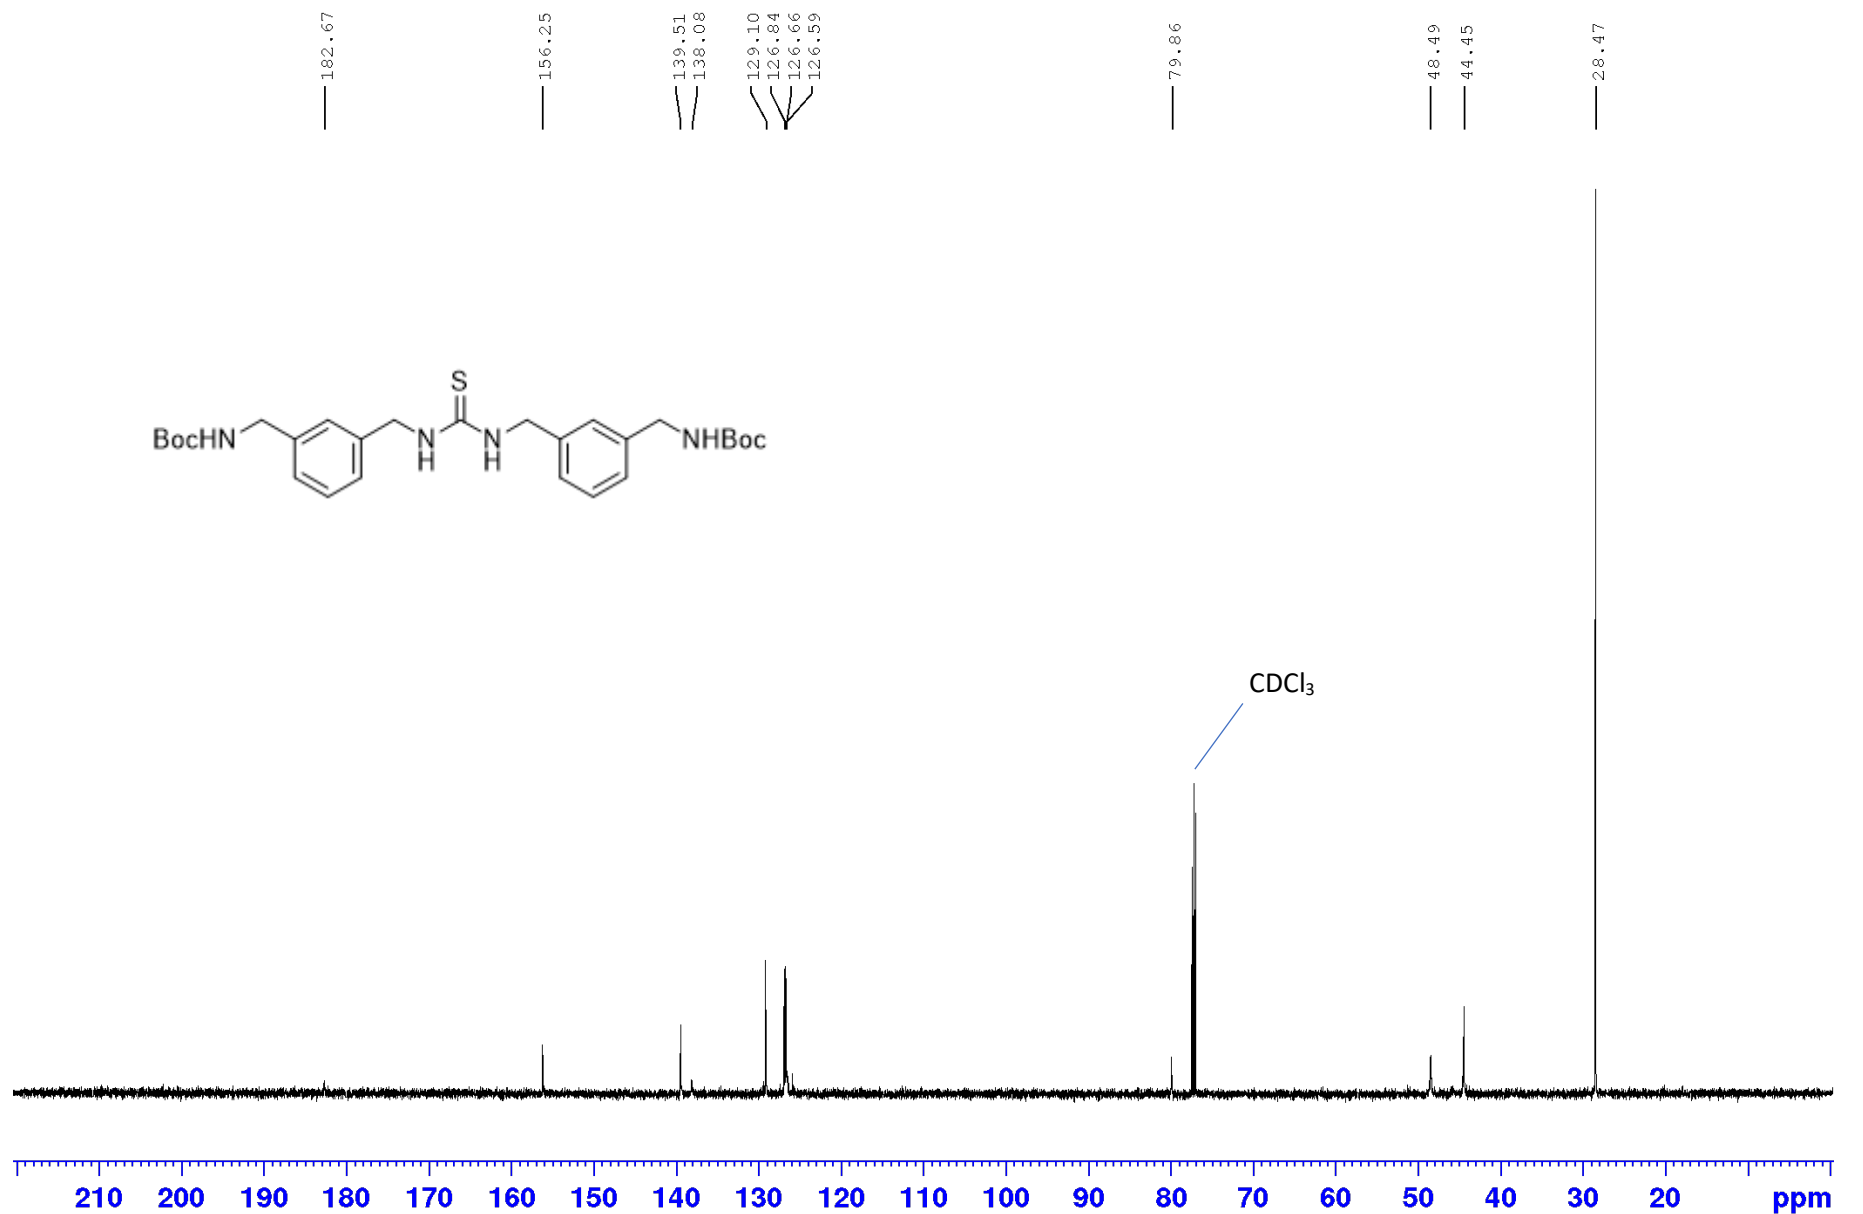

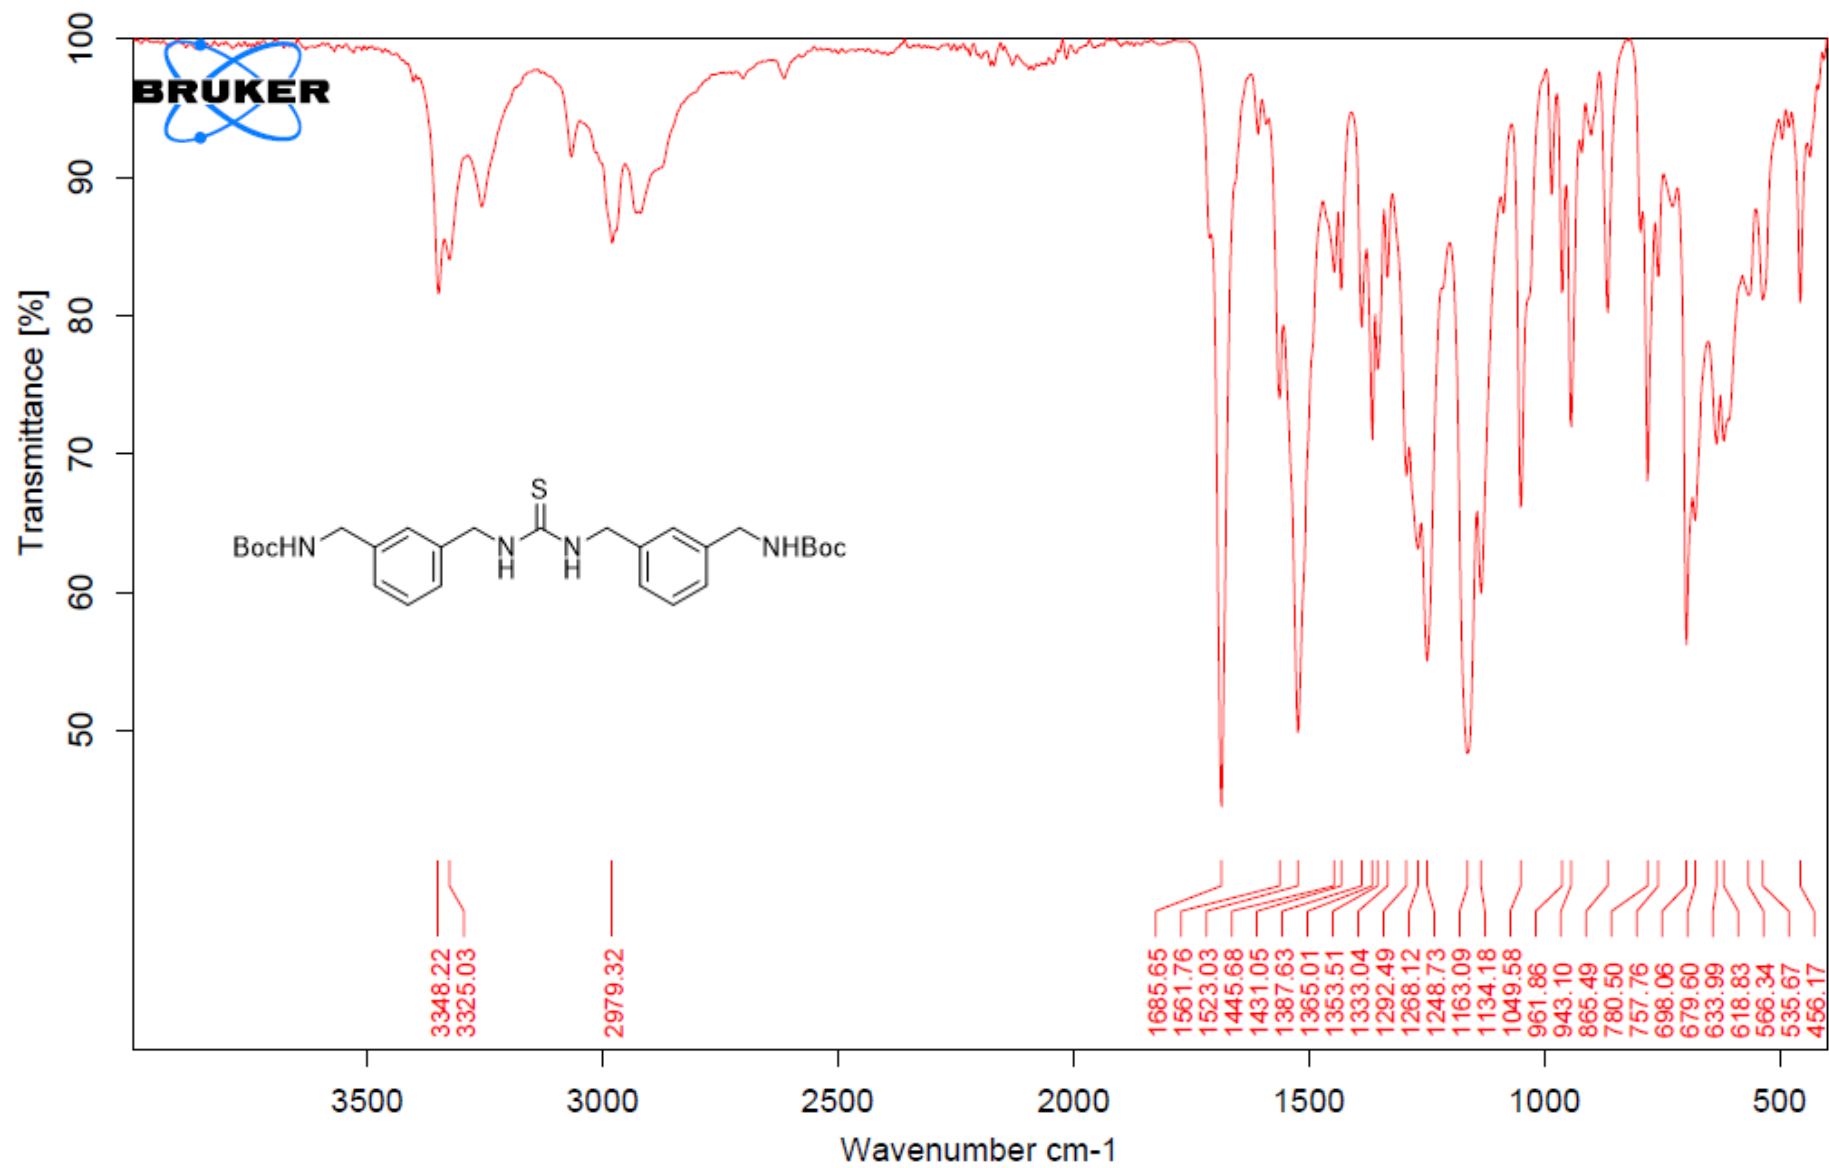

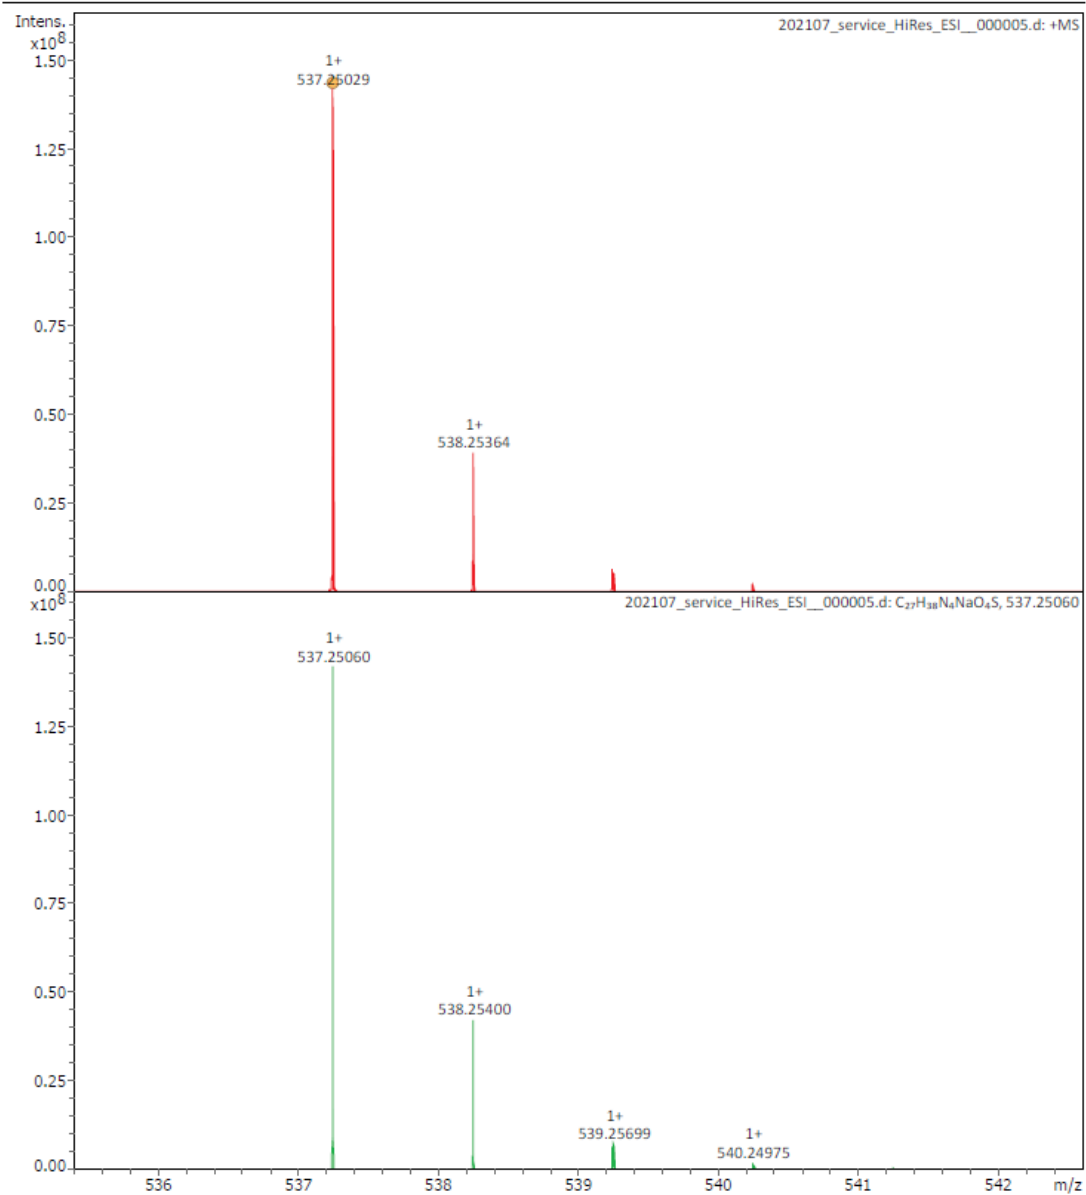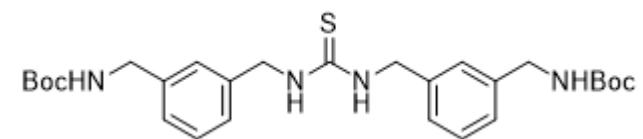

3,6-Dichloro-1,8-diisothiocyanato-9H-carbazole (5) – 300 MHz, CDCl<sub>3</sub>

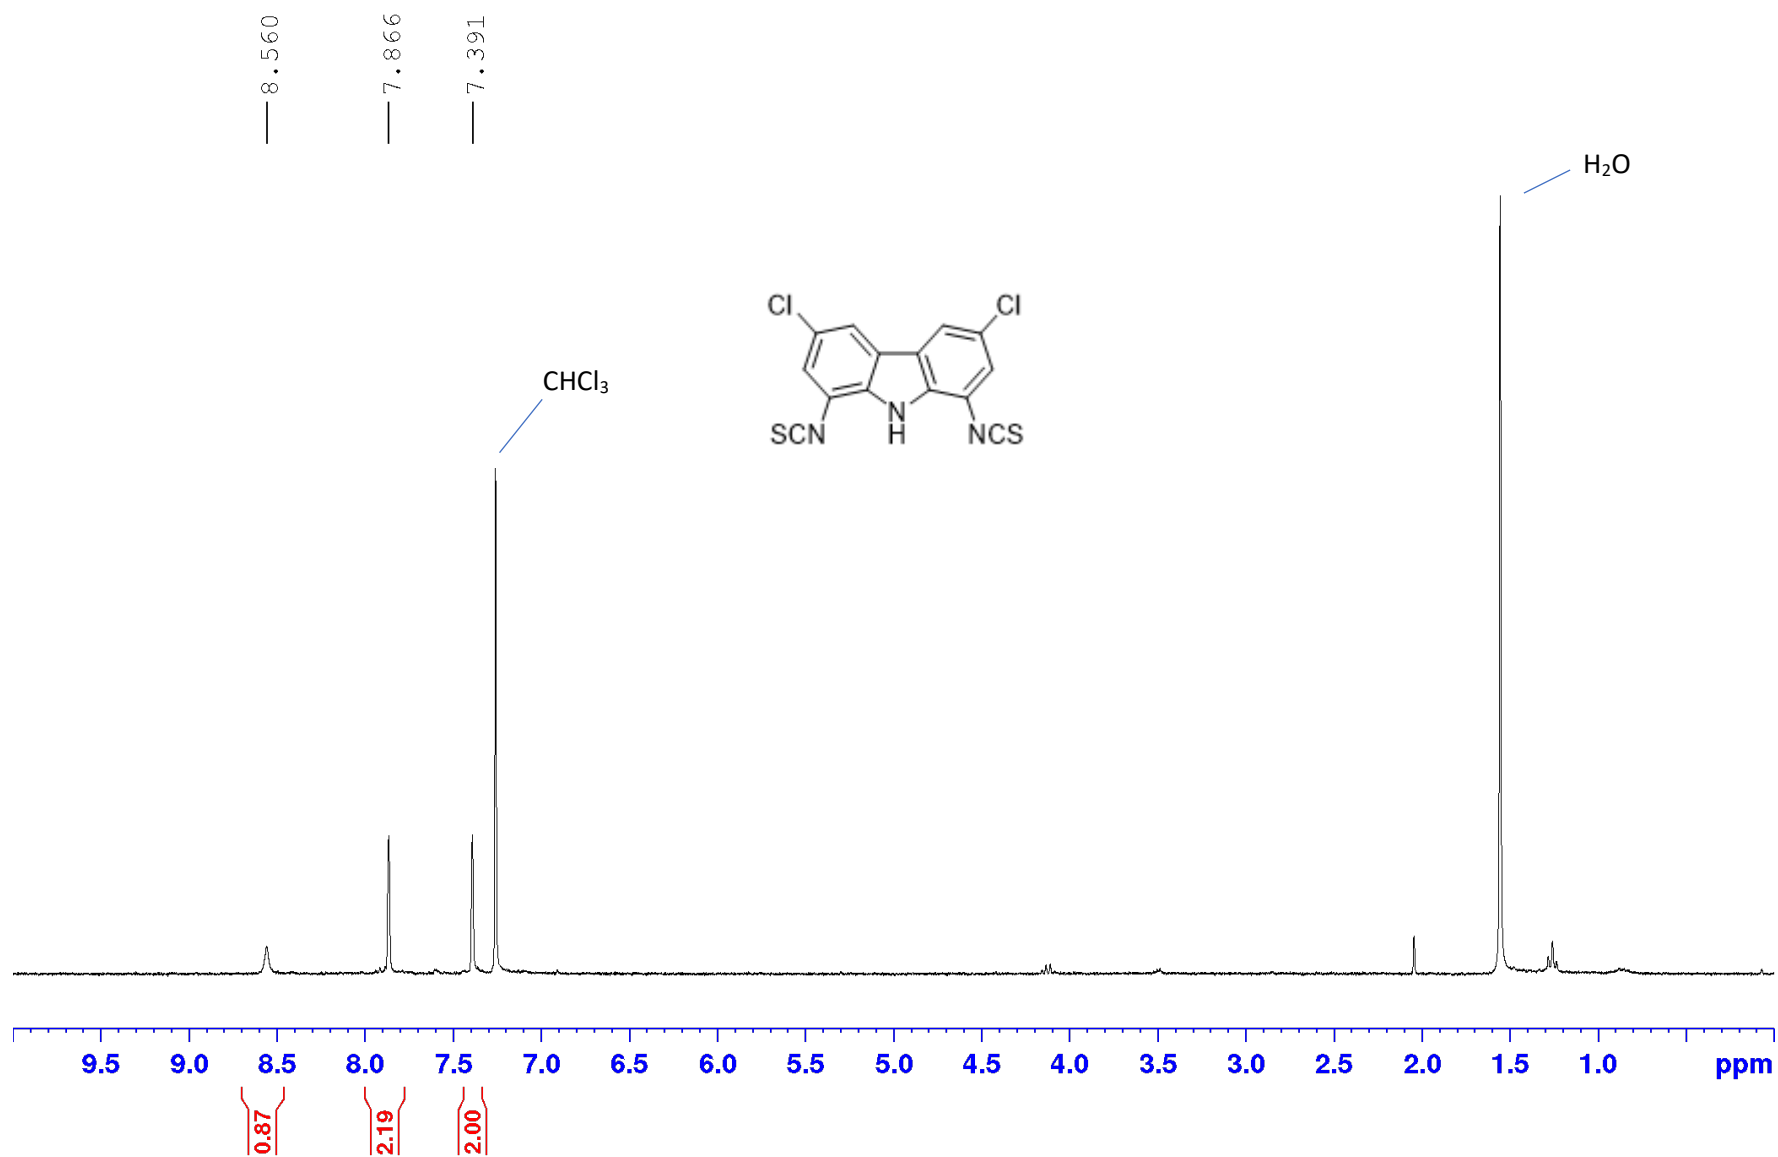

3,6-Dichloro-1,8-diisothiocyanato-9H-carbazole (5) – 125 MHz, CDCl<sub>3</sub>

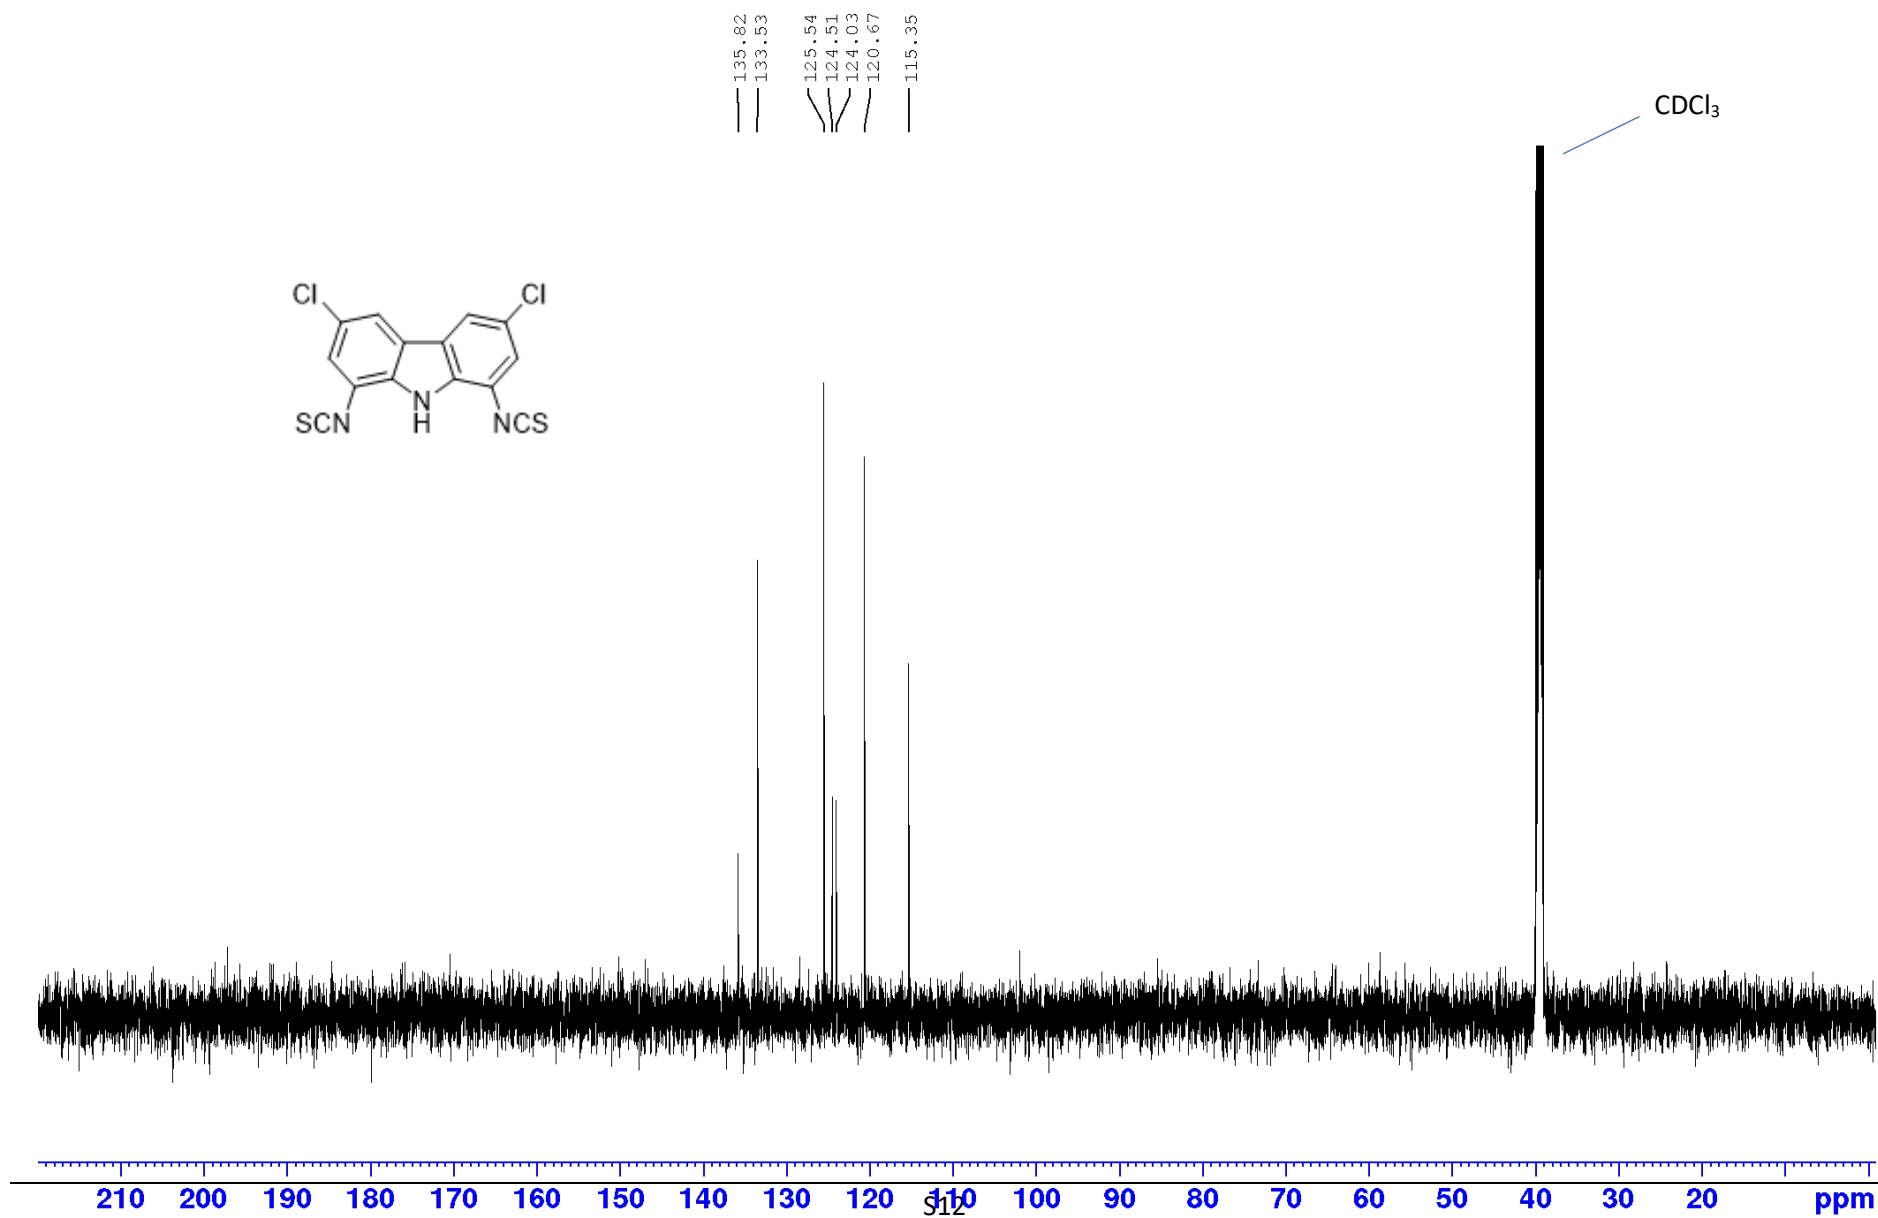

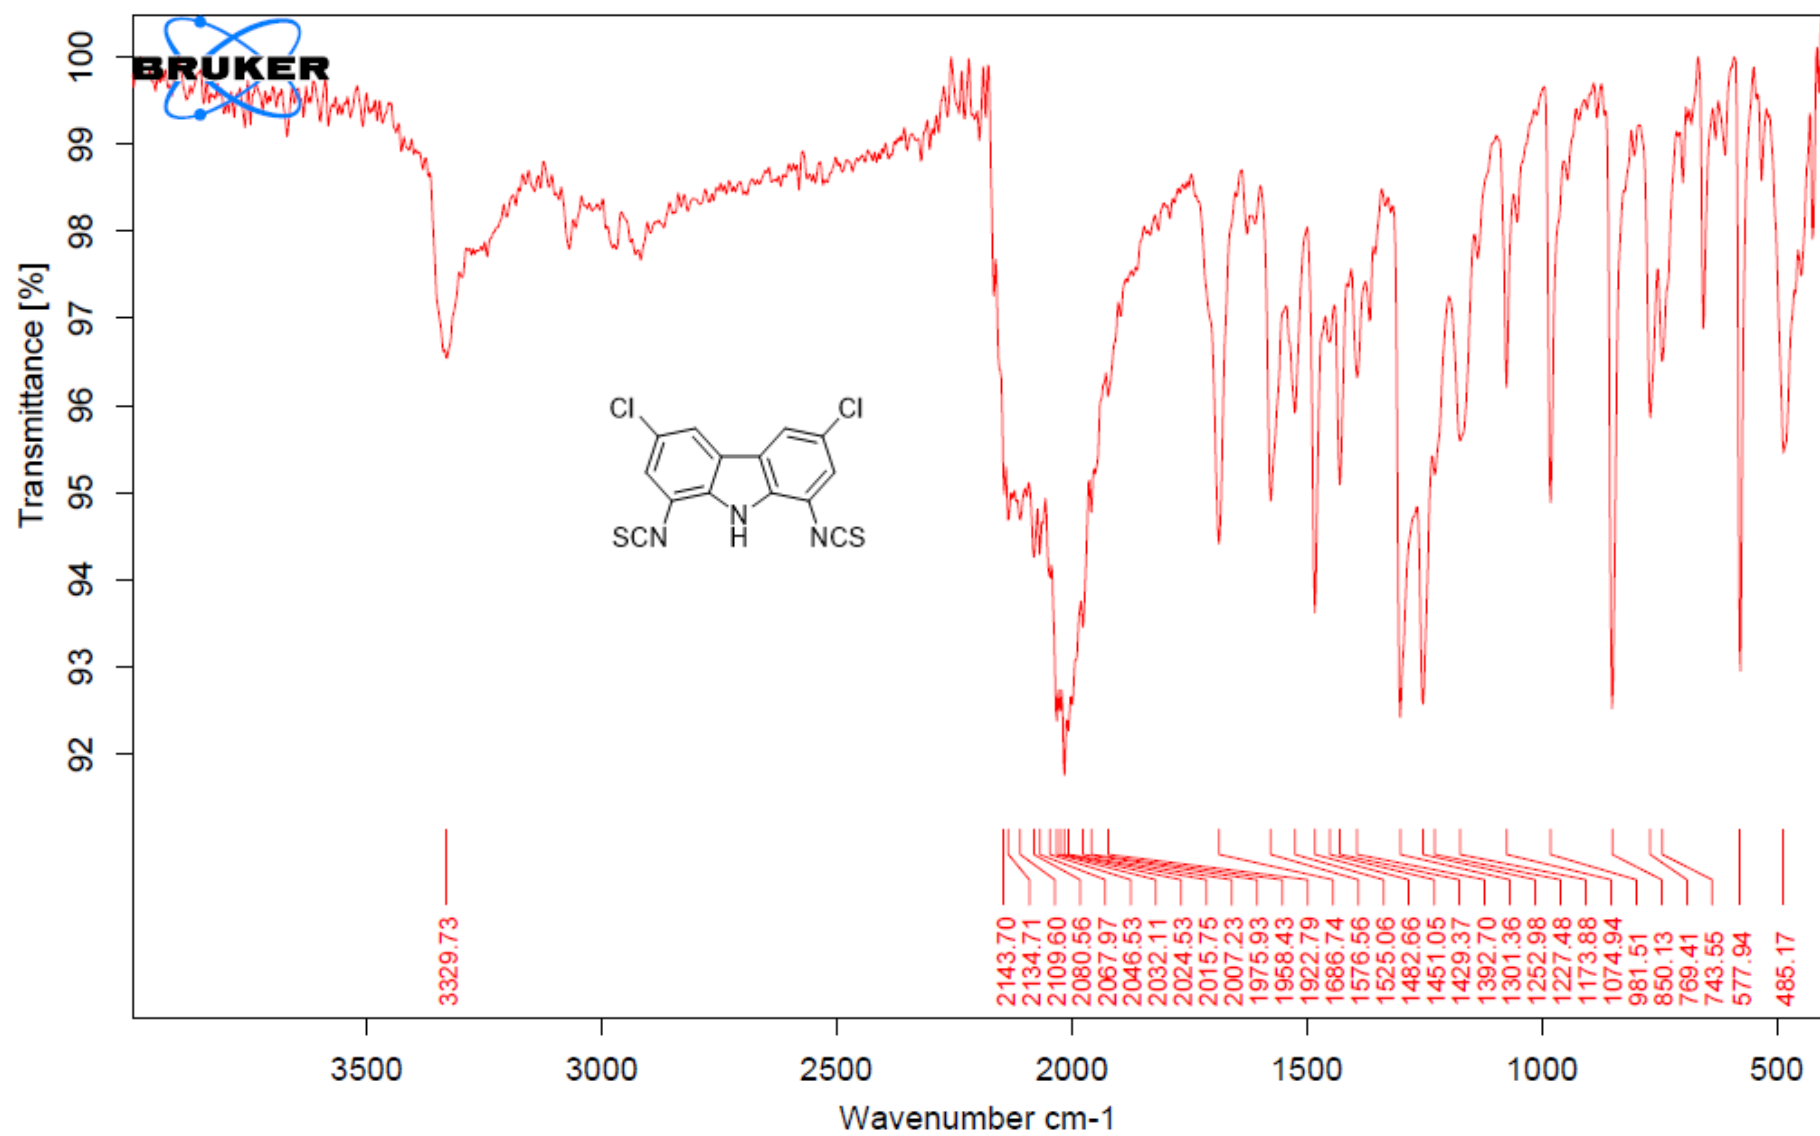

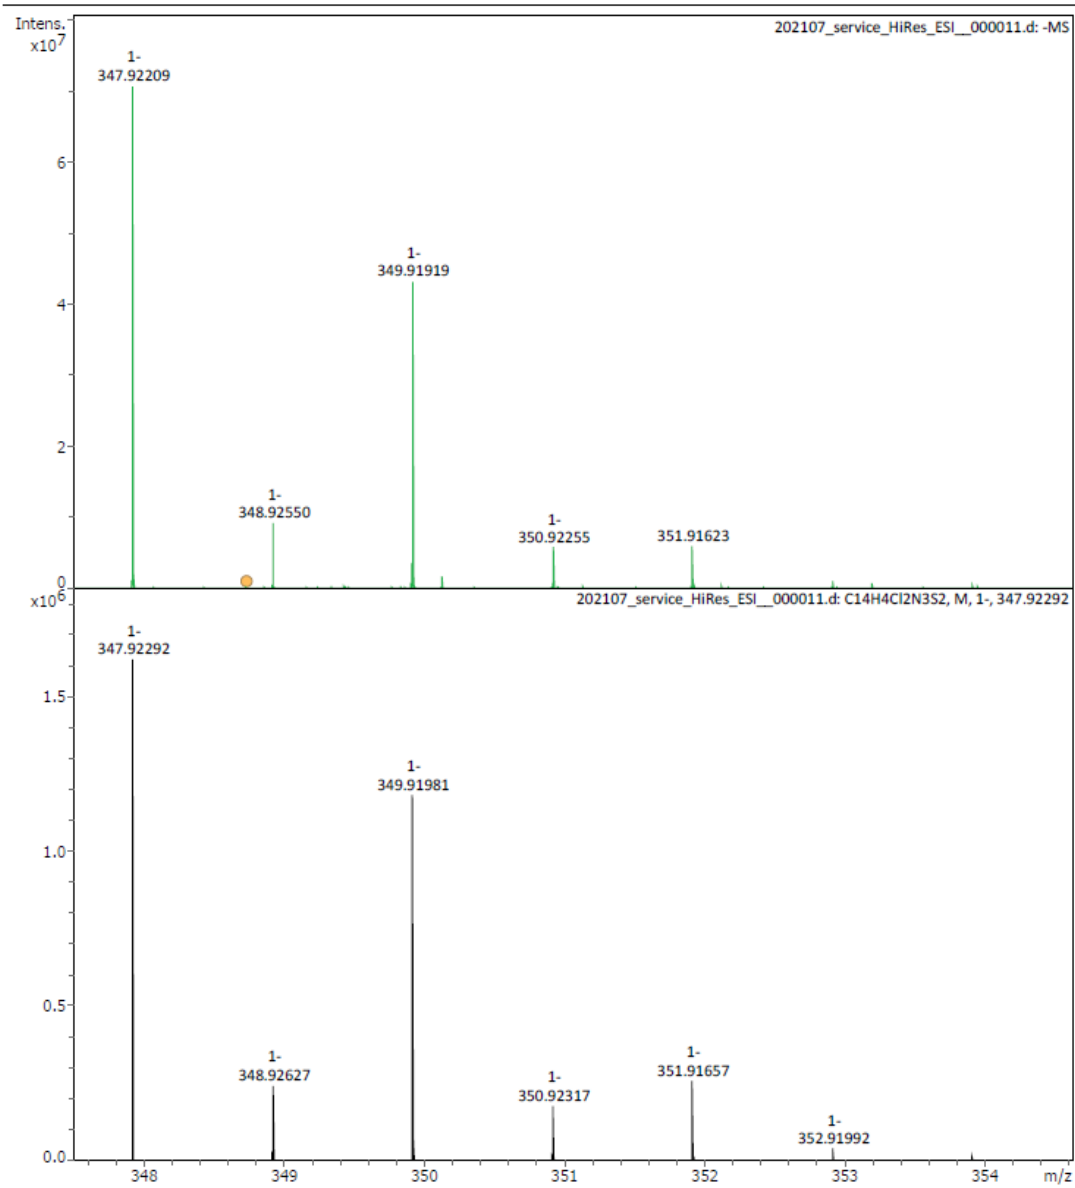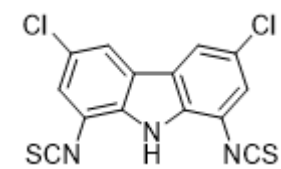

6<sup>3</sup>,6<sup>6</sup>-dichloro-6<sup>9</sup>H-3,5,7,9,13,15-hexaaza-6(1,8)-carbazola-1,11(1,3)-dibenzenacyclohexadecaphane-4,8,14-trithione (2) –400 MHz, DMSO-*d*<sub>6</sub>

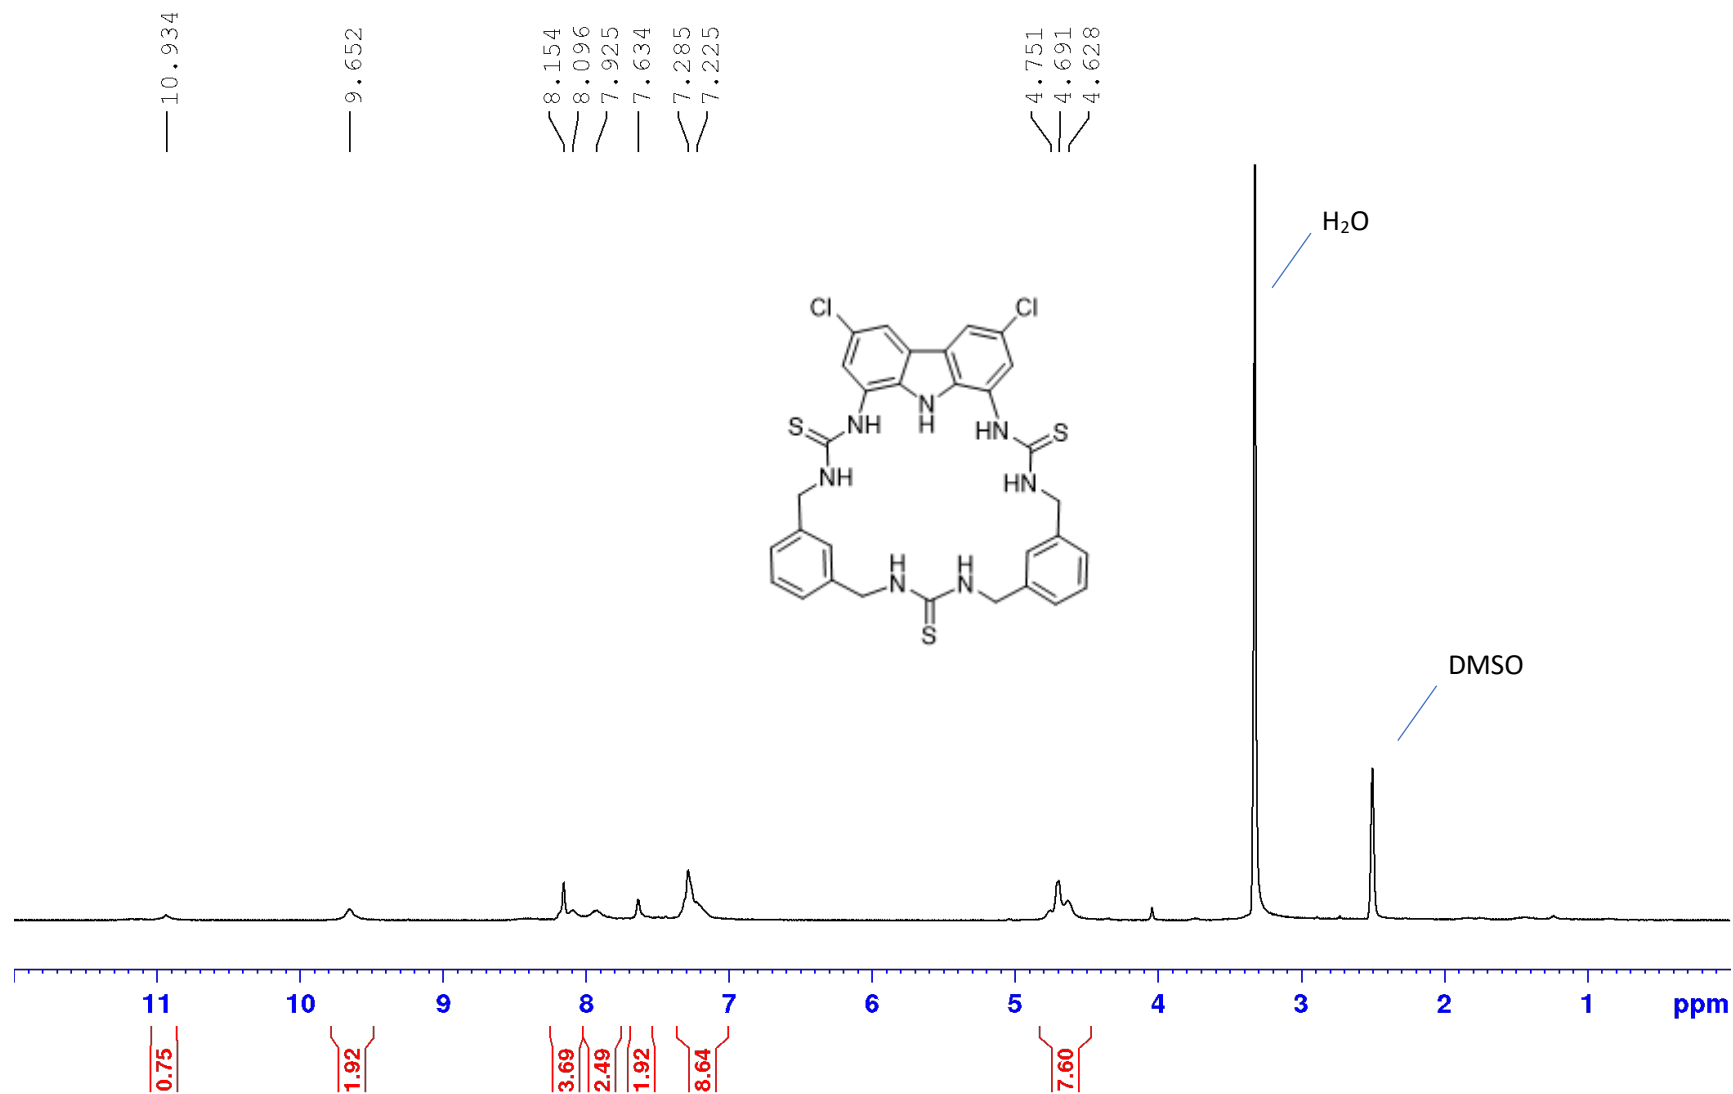

**6<sup>3</sup>,6<sup>6</sup>-dichloro-6<sup>9</sup>H-3,5,7,9,13,15-hexaaza-6(1,8)-carbazola-1,11(1,3)-dibenzenacyclohexadecaphane-4,8,14-trithione (2)(bound to TBA<sub>2</sub>HPO<sub>4</sub>) –400 MHz, DMSO-*d*<sub>6</sub>**

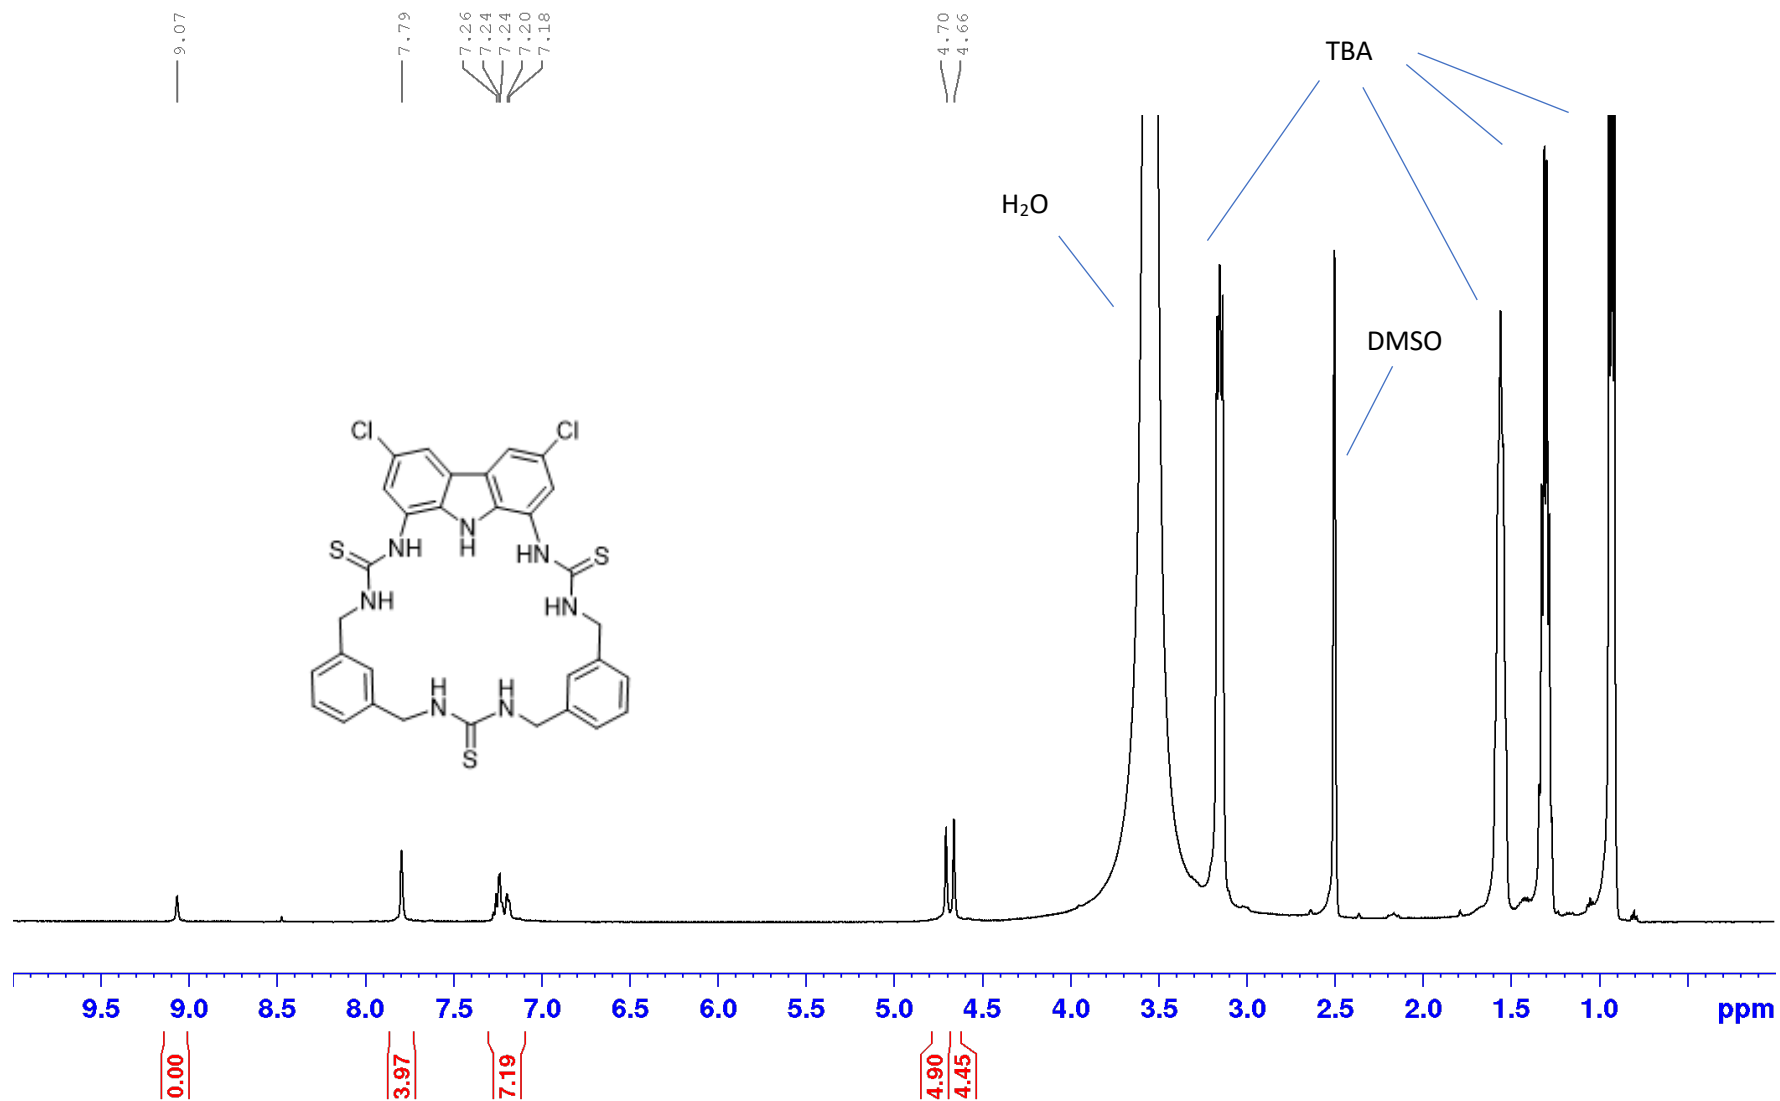

**6<sup>3</sup>,6<sup>6</sup>-dichloro-6<sup>9</sup>H-3,5,7,9,13,15-hexaaza-6(1,8)-carbazola-1,11(1,3)-dibenzenacyclohexadecaphane-4,8,14-trithione (2)(bound to TBA<sub>2</sub>HPO<sub>4</sub>) –400 MHz, DMSO-*d*<sub>6</sub>**

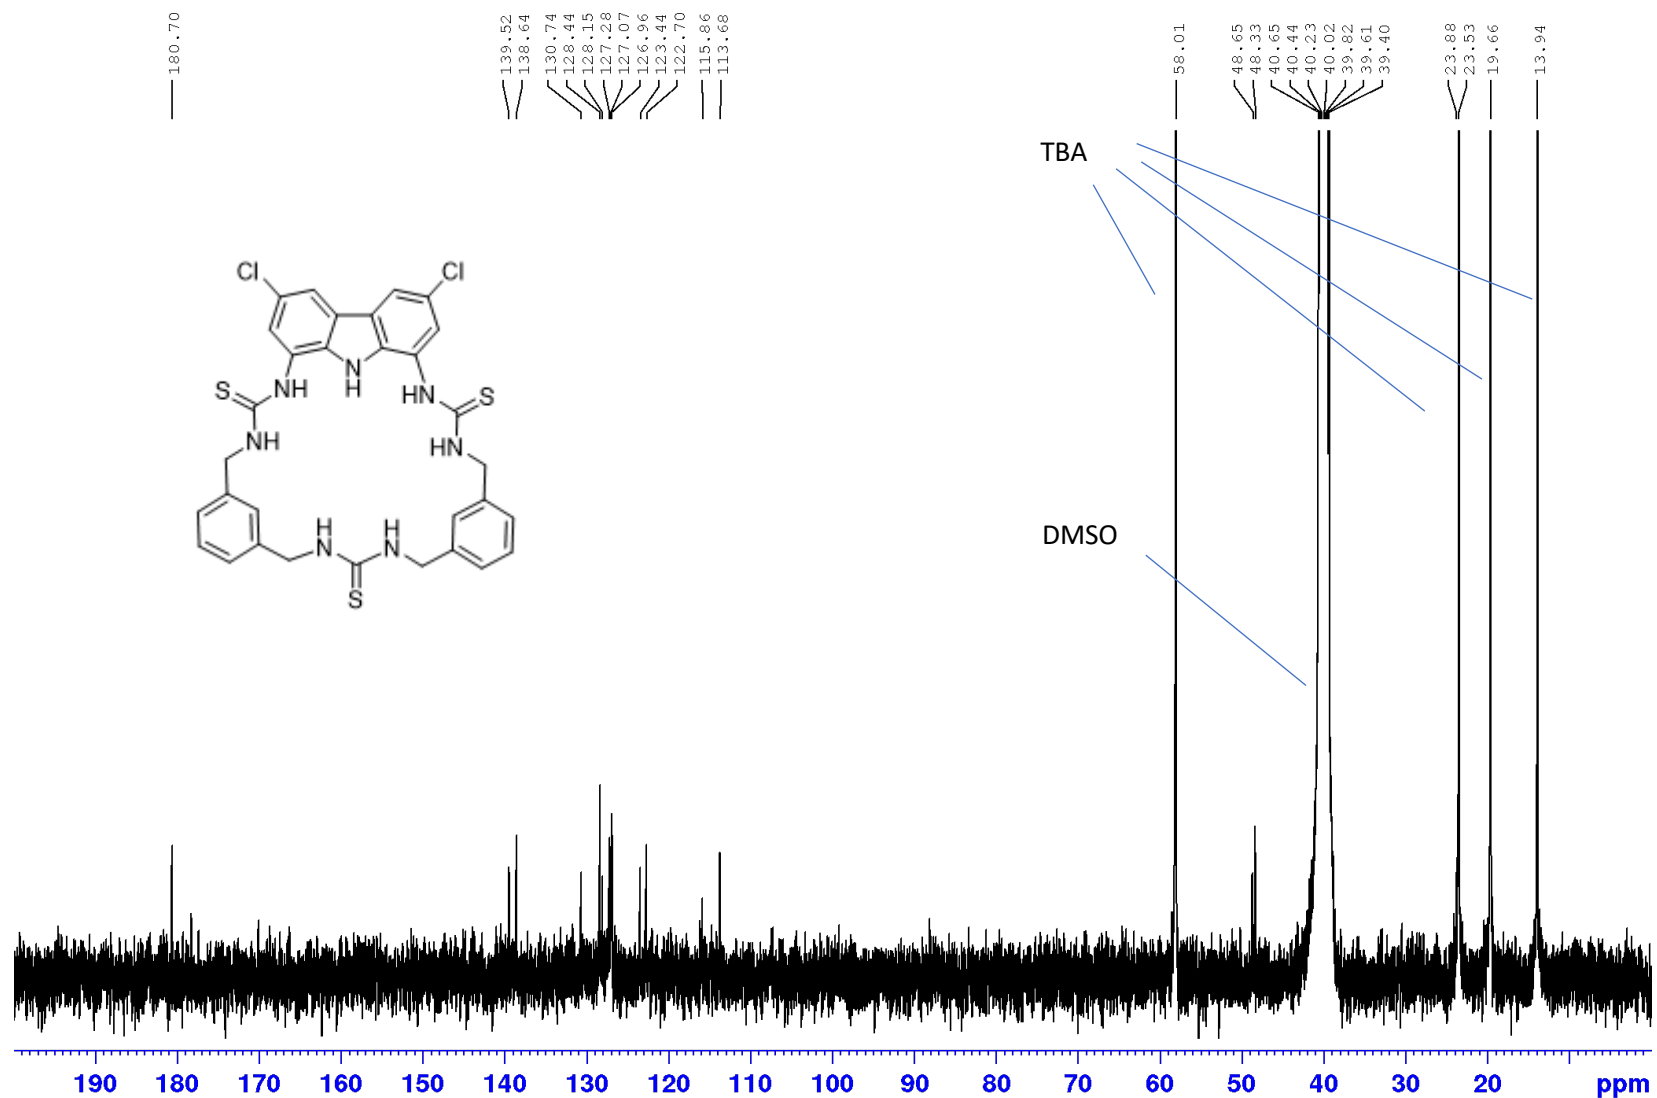

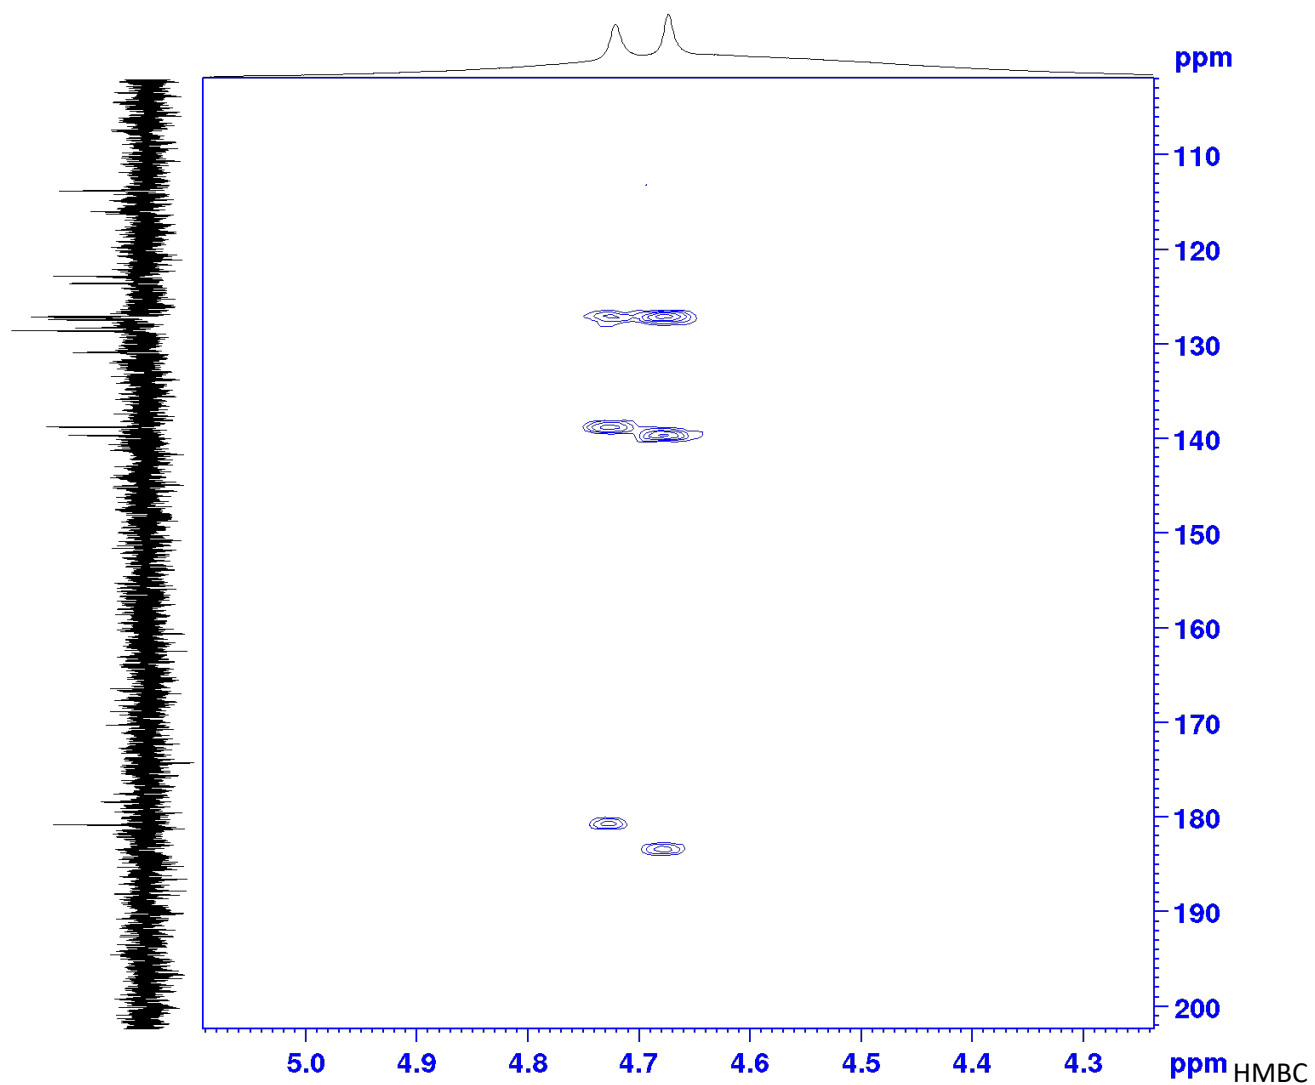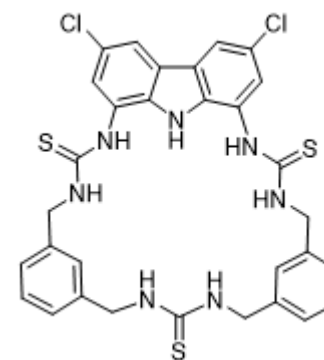

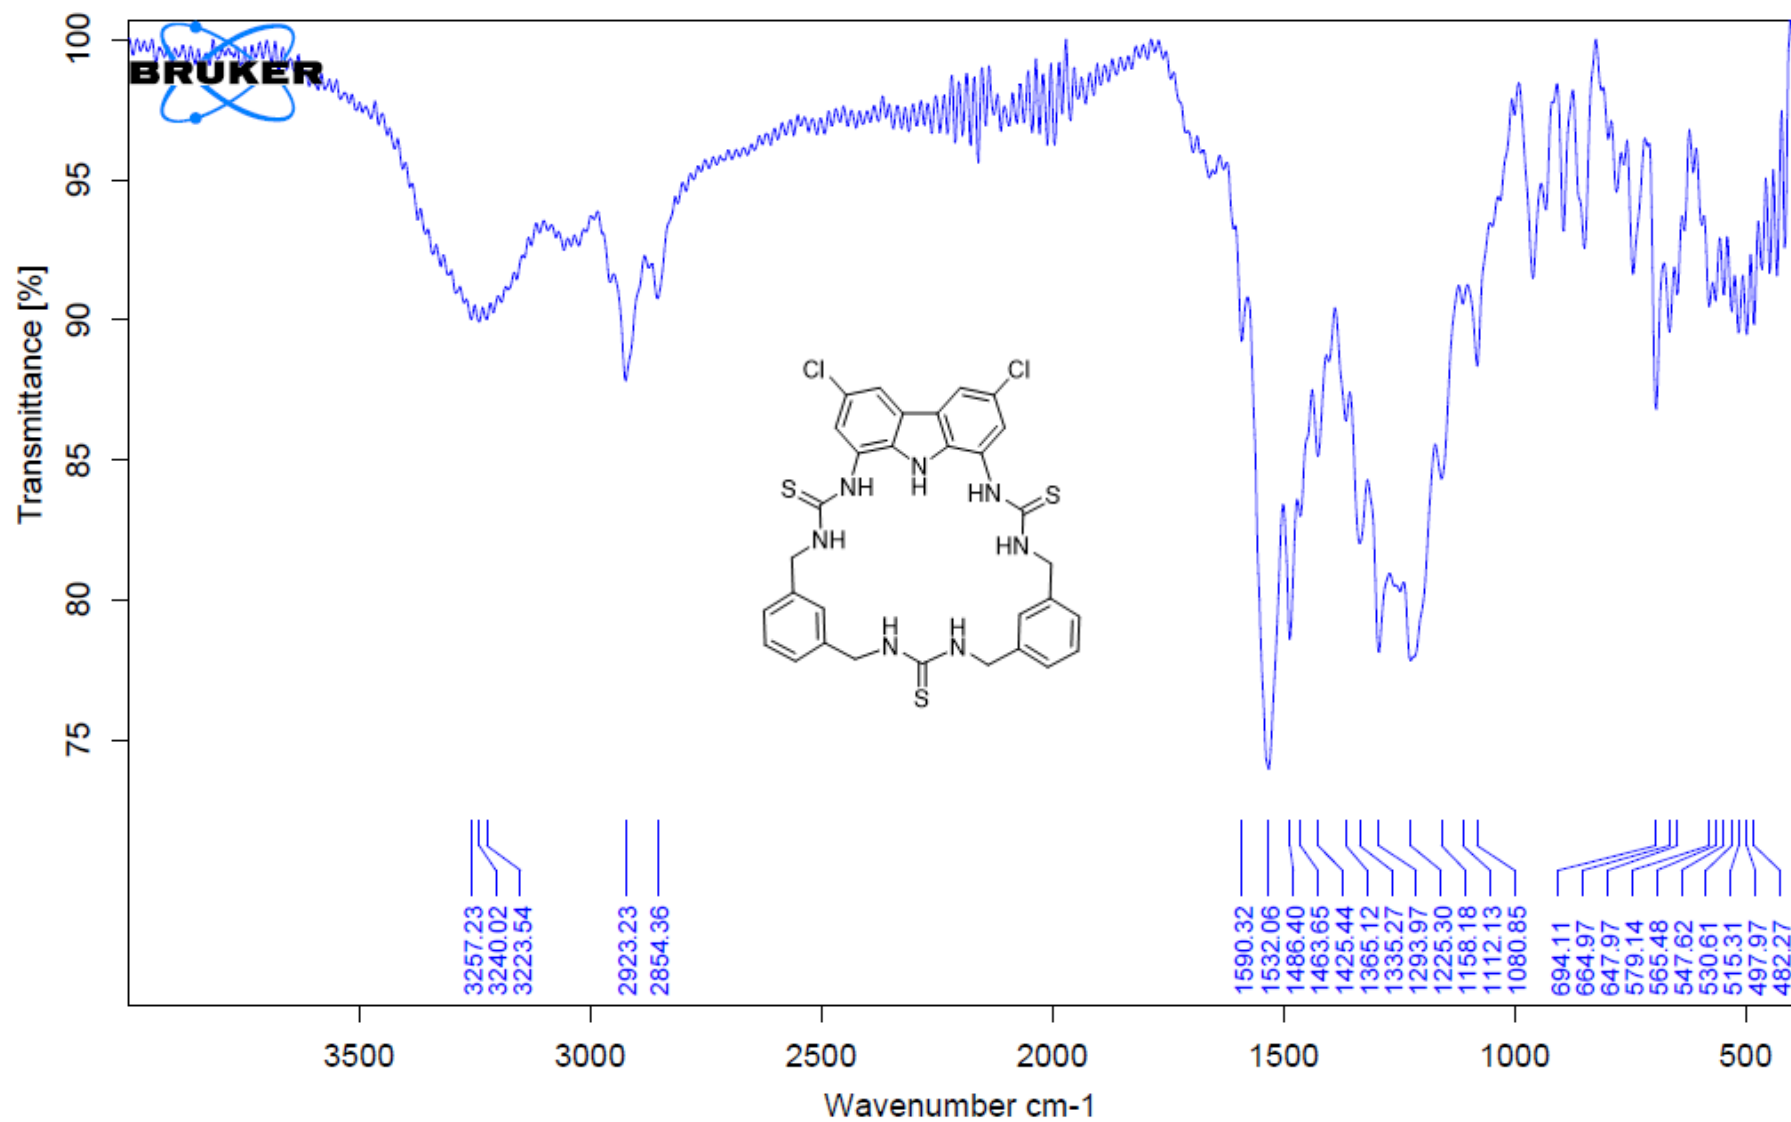

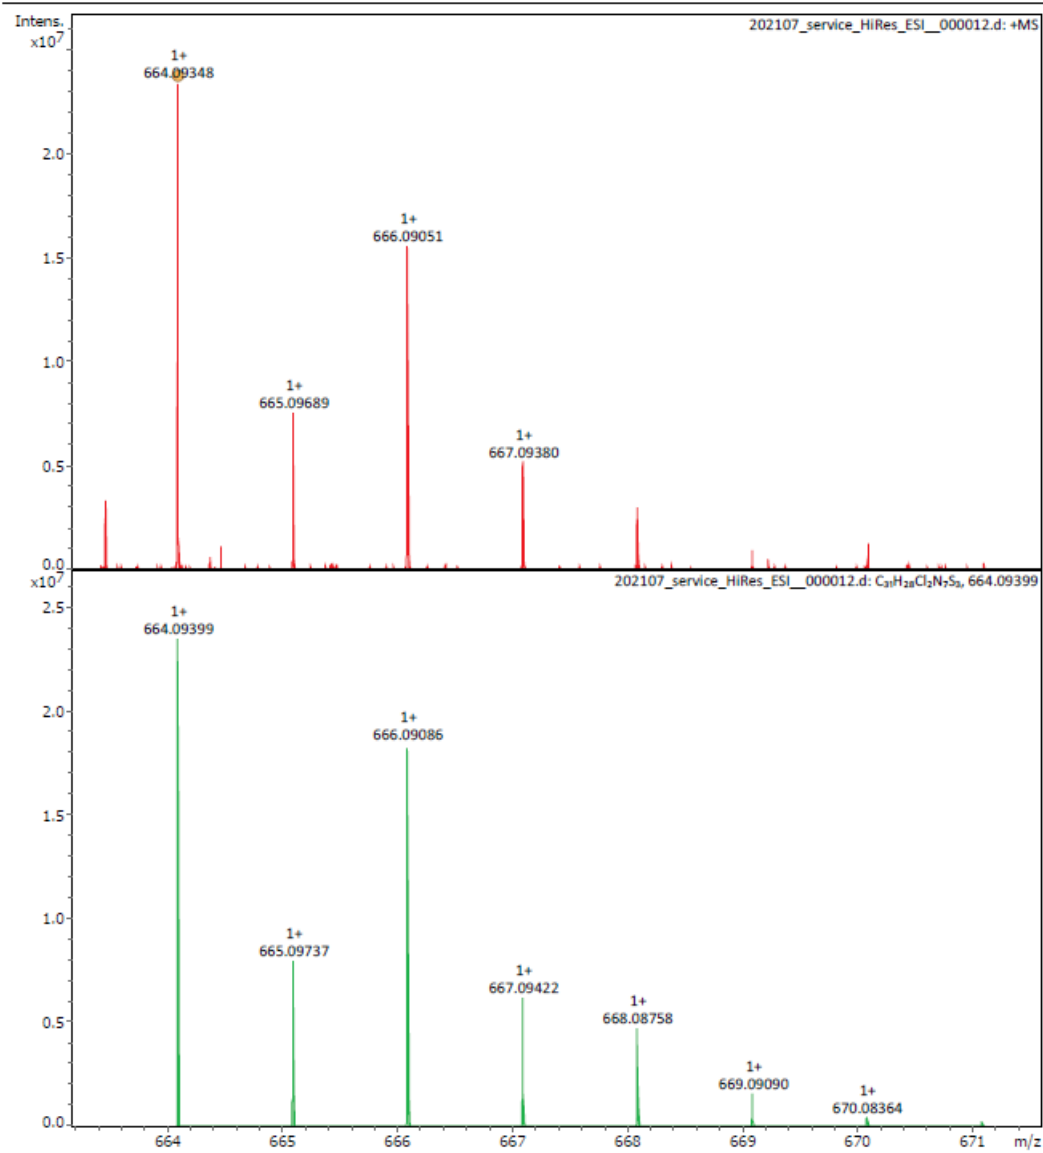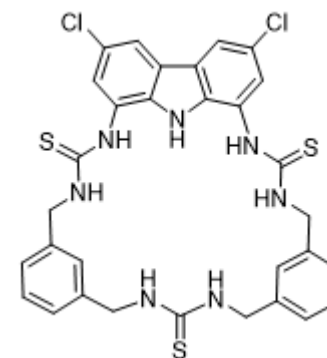

## Additional Figures

Figure S1—DFT modelling of receptor 2 with A: adipate; B: terephthalate

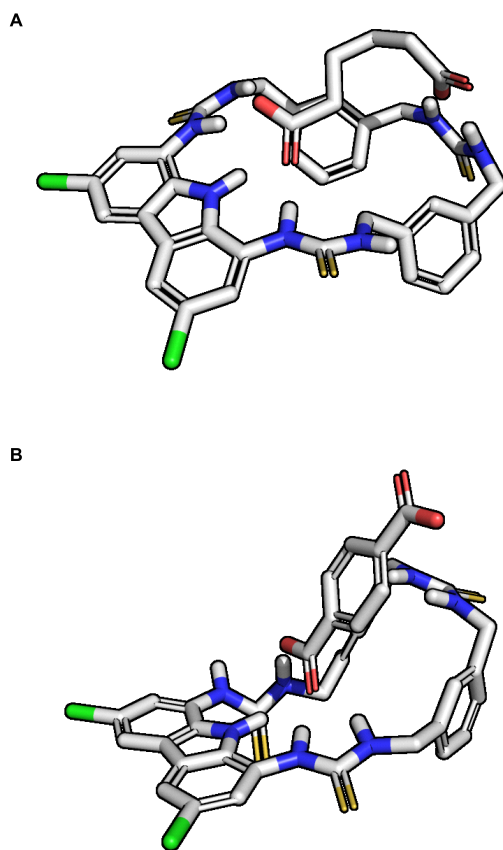

Figure S2—Variable temperature  $^1\text{H}$  NMR

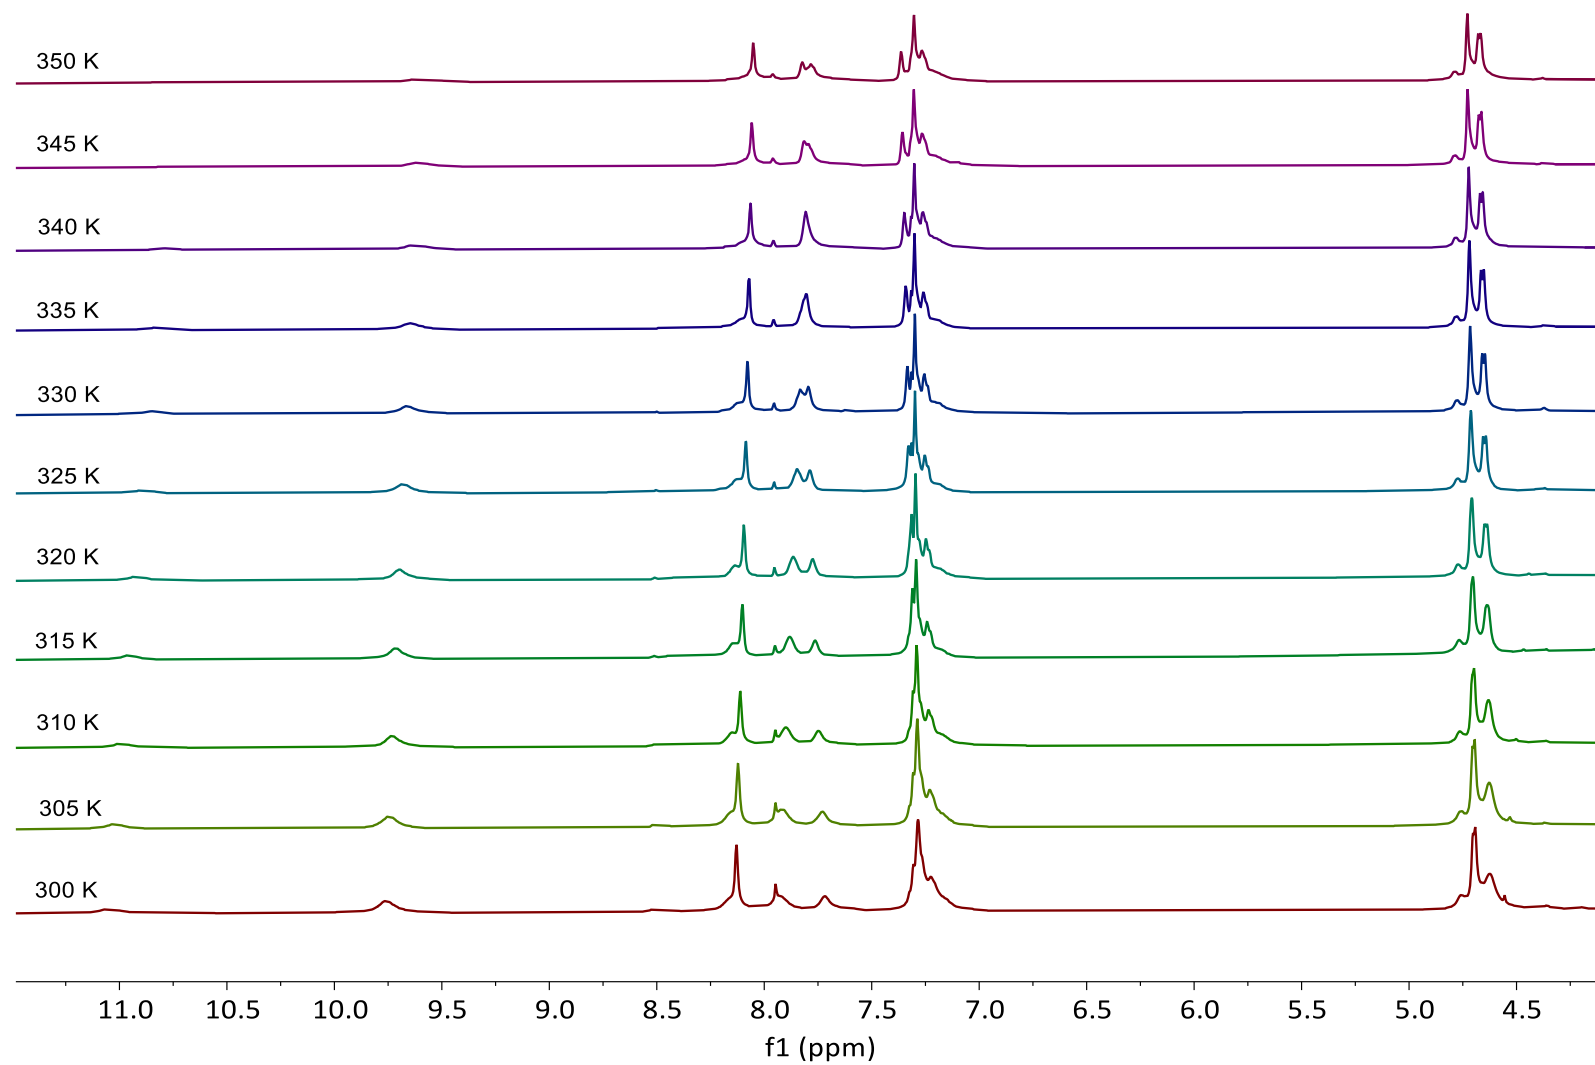

Figure S3—Terephthalate  $^1\text{H}$  NMR titration

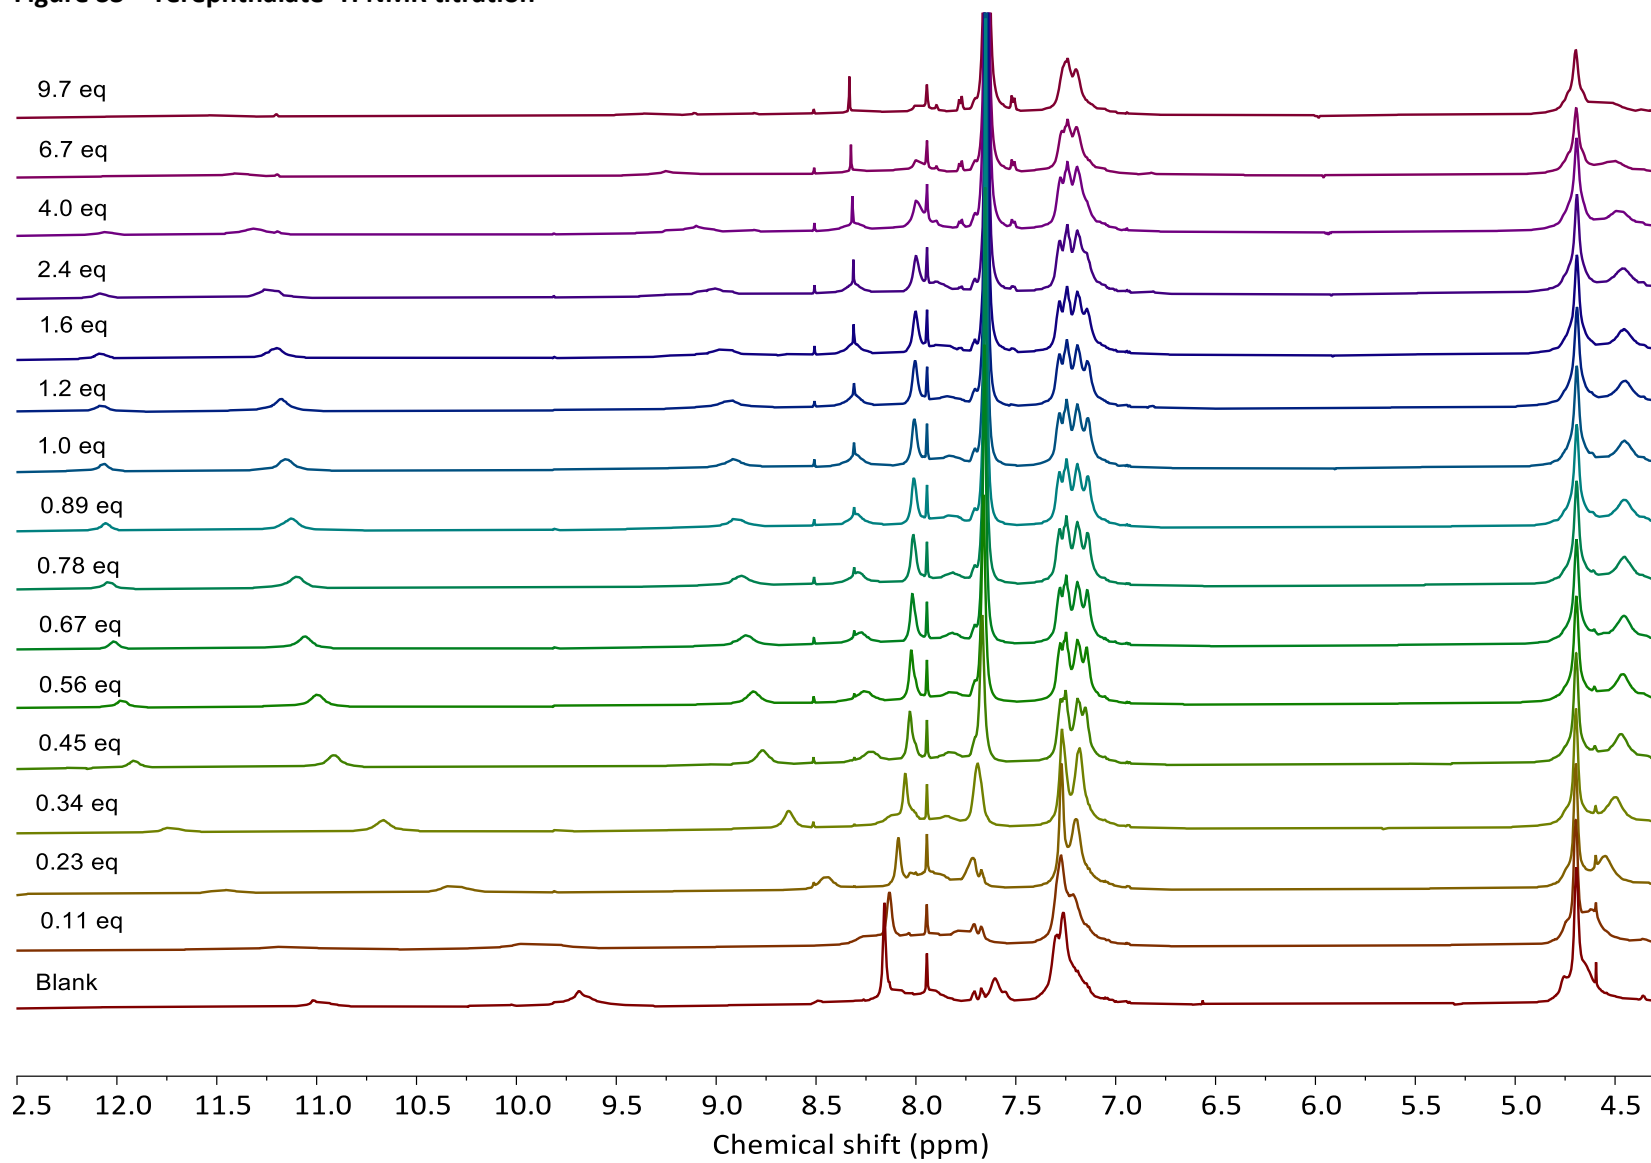

**Figure S4—Propiolate  $^1\text{H}$  NMR titration**

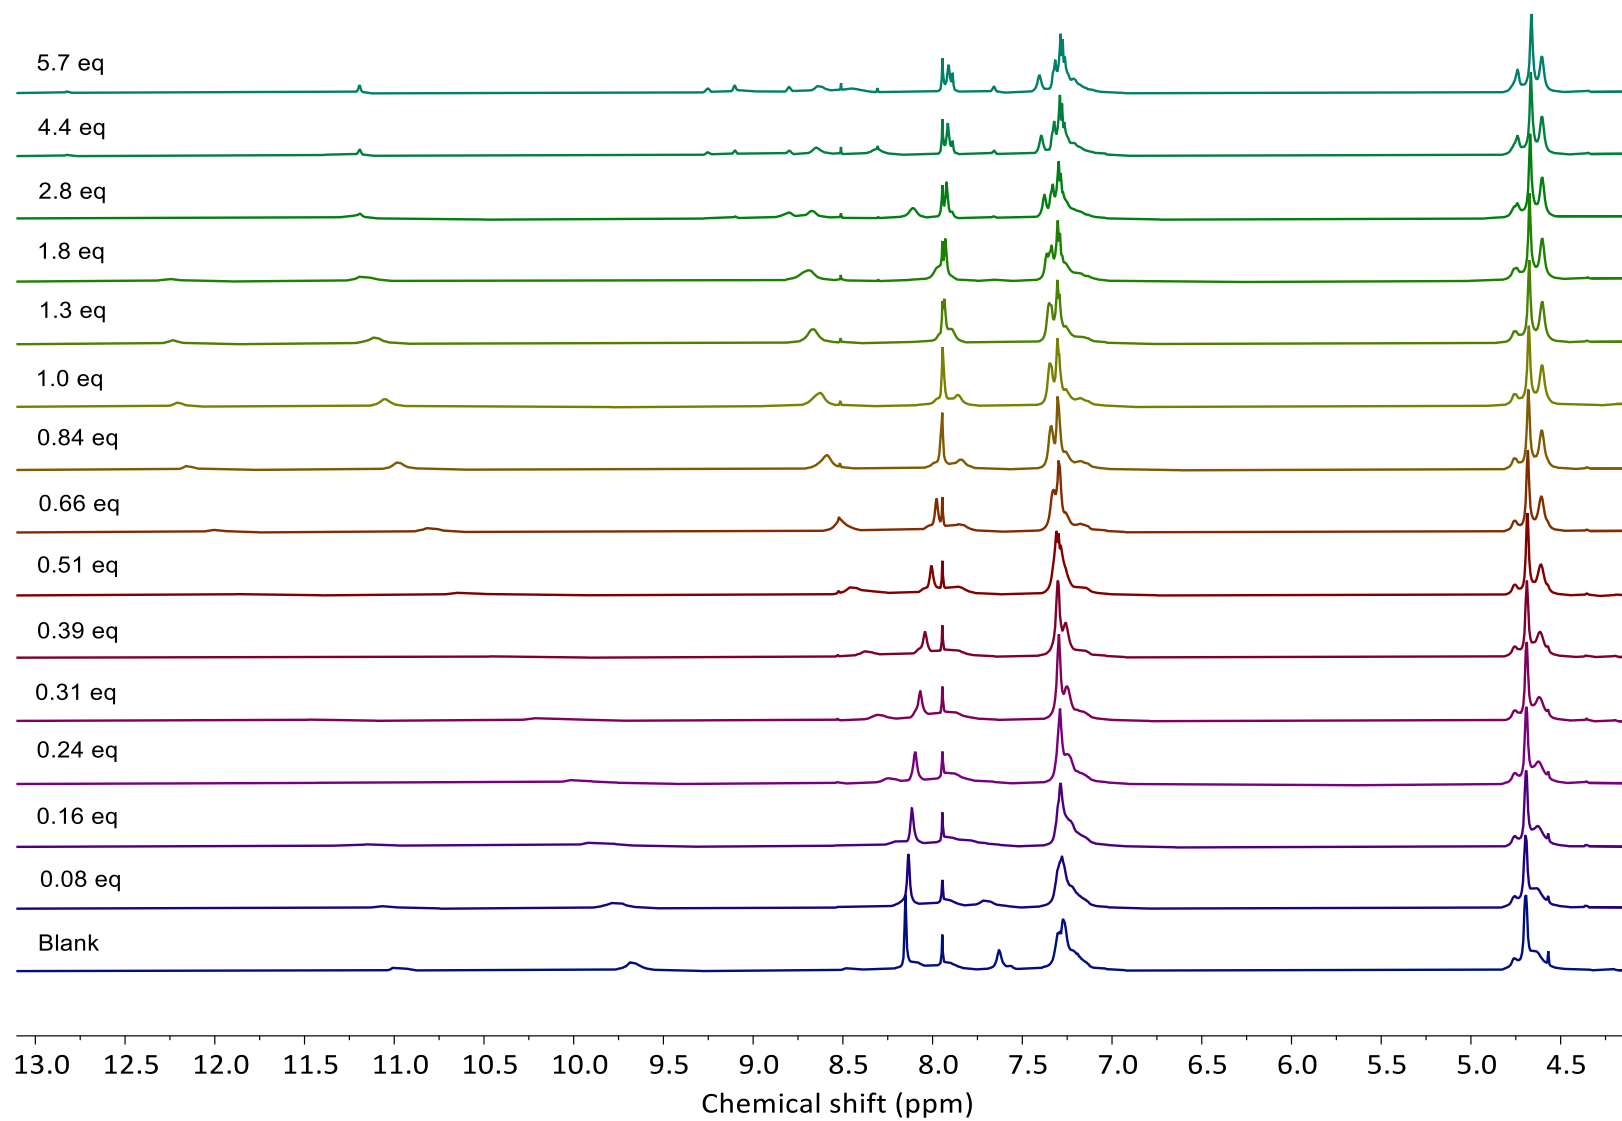

Figure S5—Malonate  $^1\text{H}$  NMR titration

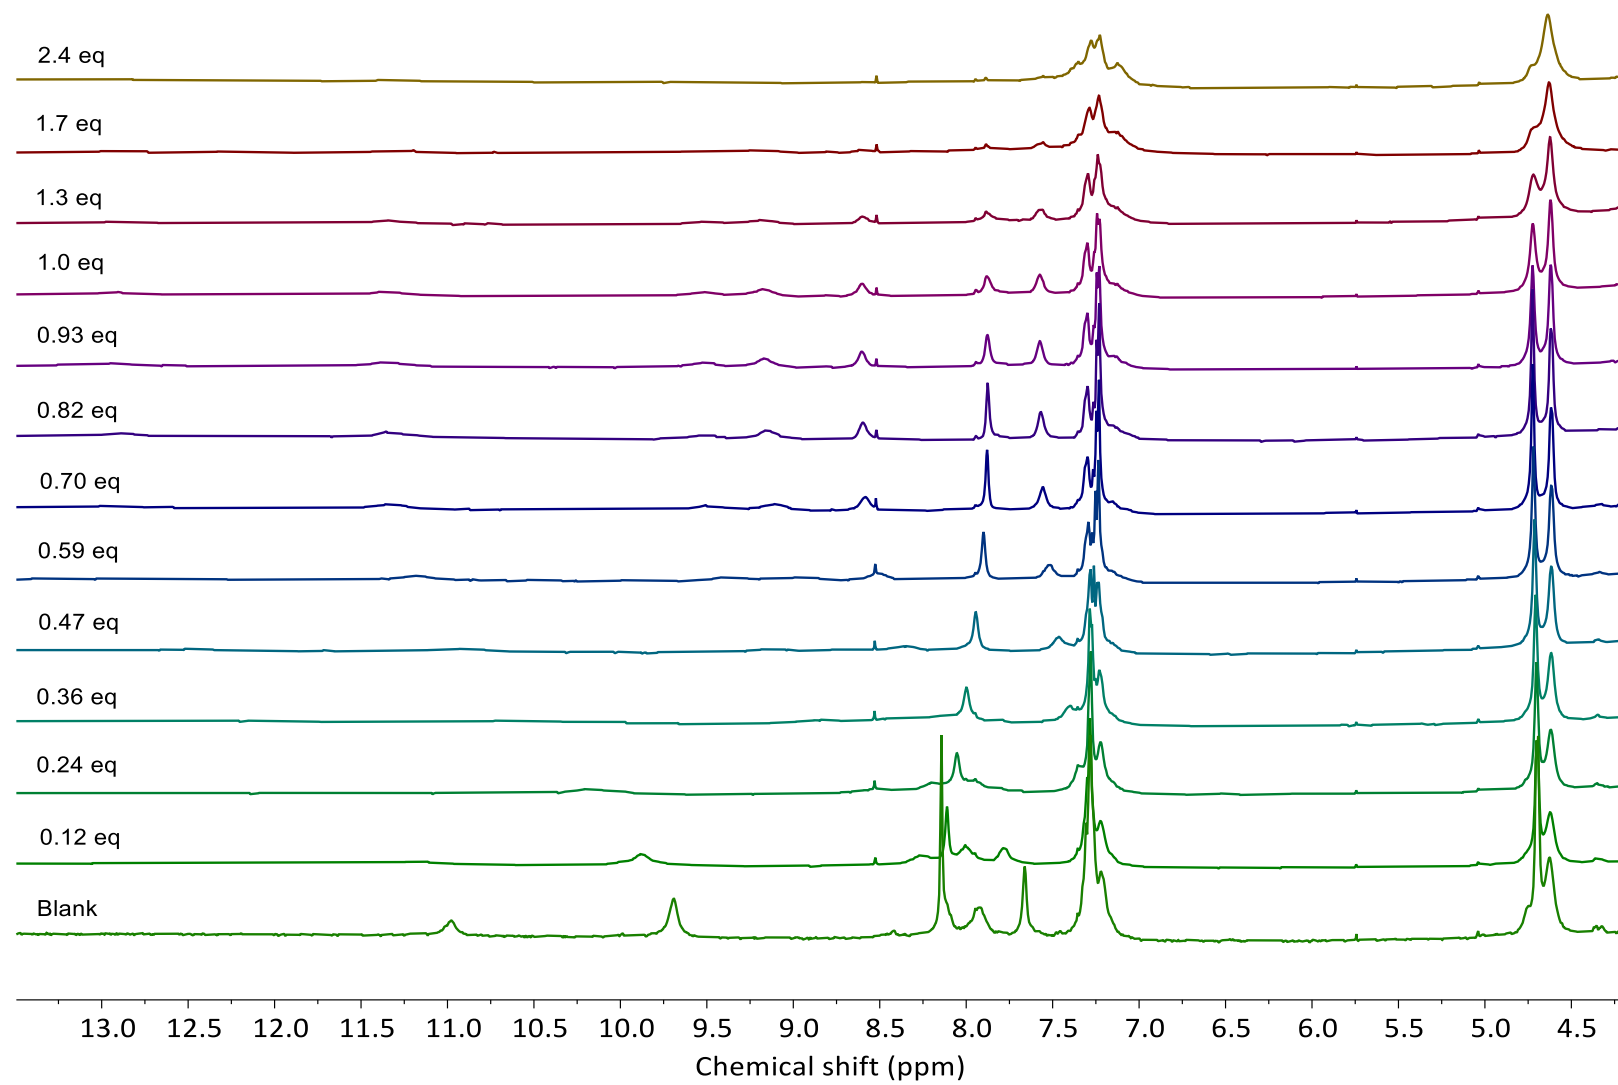

**Figure S6—Screening data: all anions**

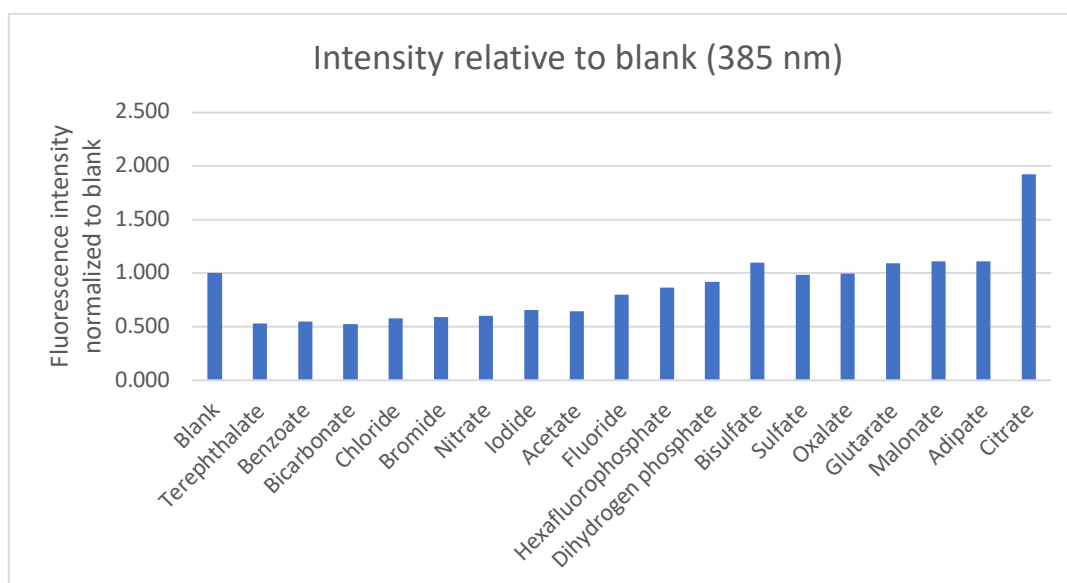

Changes in fluorescence intensity at 385 nm of receptor **2** (25  $\mu\text{M}$ ) in 9:1  $\text{CH}_2\text{Cl}_2$ :methanol relative to intensity of blank with: 100 equivalents of anion ( $\lambda_{\text{ex}} = 300 \text{ nm}$ ).

Figure S7—Excitation/emission spectrum of receptor 2

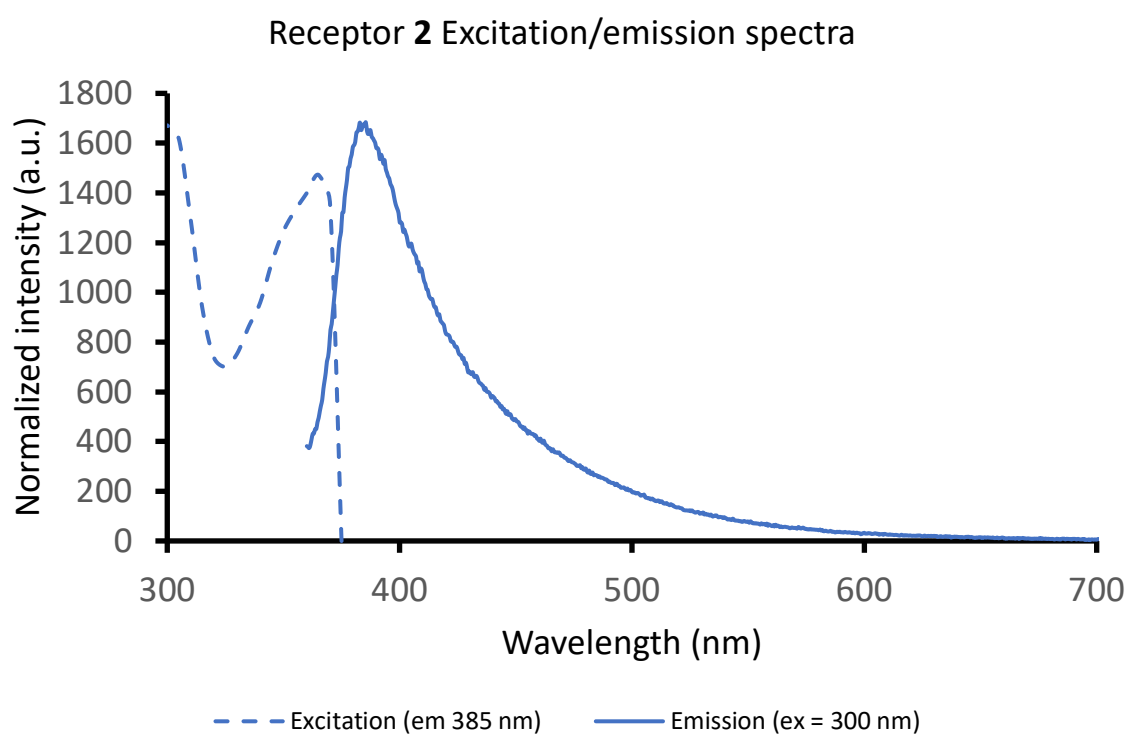

Excitation ( $\lambda_{em}= 385$  nm) and emission ( $\lambda_{ex}= 300$  nm) spectra of receptor 2 (25  $\mu$ M in DMSO).

Figure S8—Fluorescence titration of receptor **2** (25  $\mu\text{M}$ ) with citrate in 9:1  $\text{CH}_2\text{Cl}_2/\text{MeOH}$

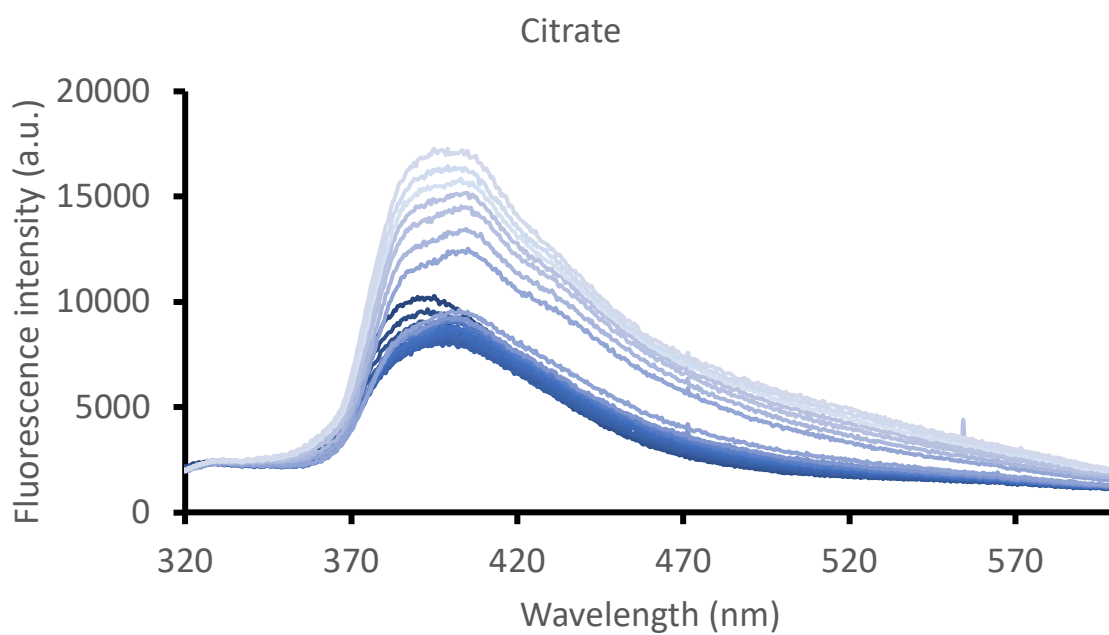

Representative data and fit of 1:2 binding model between receptor **2** and citrate. Coloured dots represent data collected at 380 nm (orange) and 420 nm (yellow), and dotted lines the expected fit.

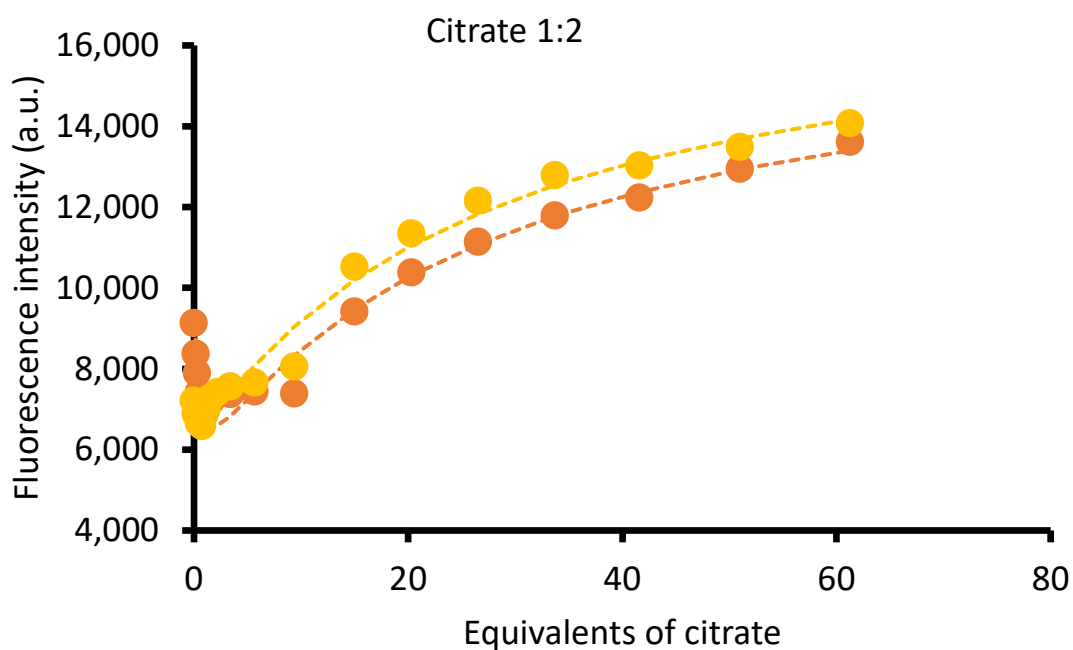

<http://app.supramolecular.org/bindfit/view/532ac009-1054-4c00-856b-1e0603d80eec>

**Figure S9—Deprotonation of receptor 2 (25  $\mu$ M) in DMSO**

Receptor 2 undergoes excited state deprotonation in the presence of carboxylates in aqueous DMSO, leading to a new emission maximum at 465 nm. This matches the spectrum of receptor 2 deprotonated with TBAOH.

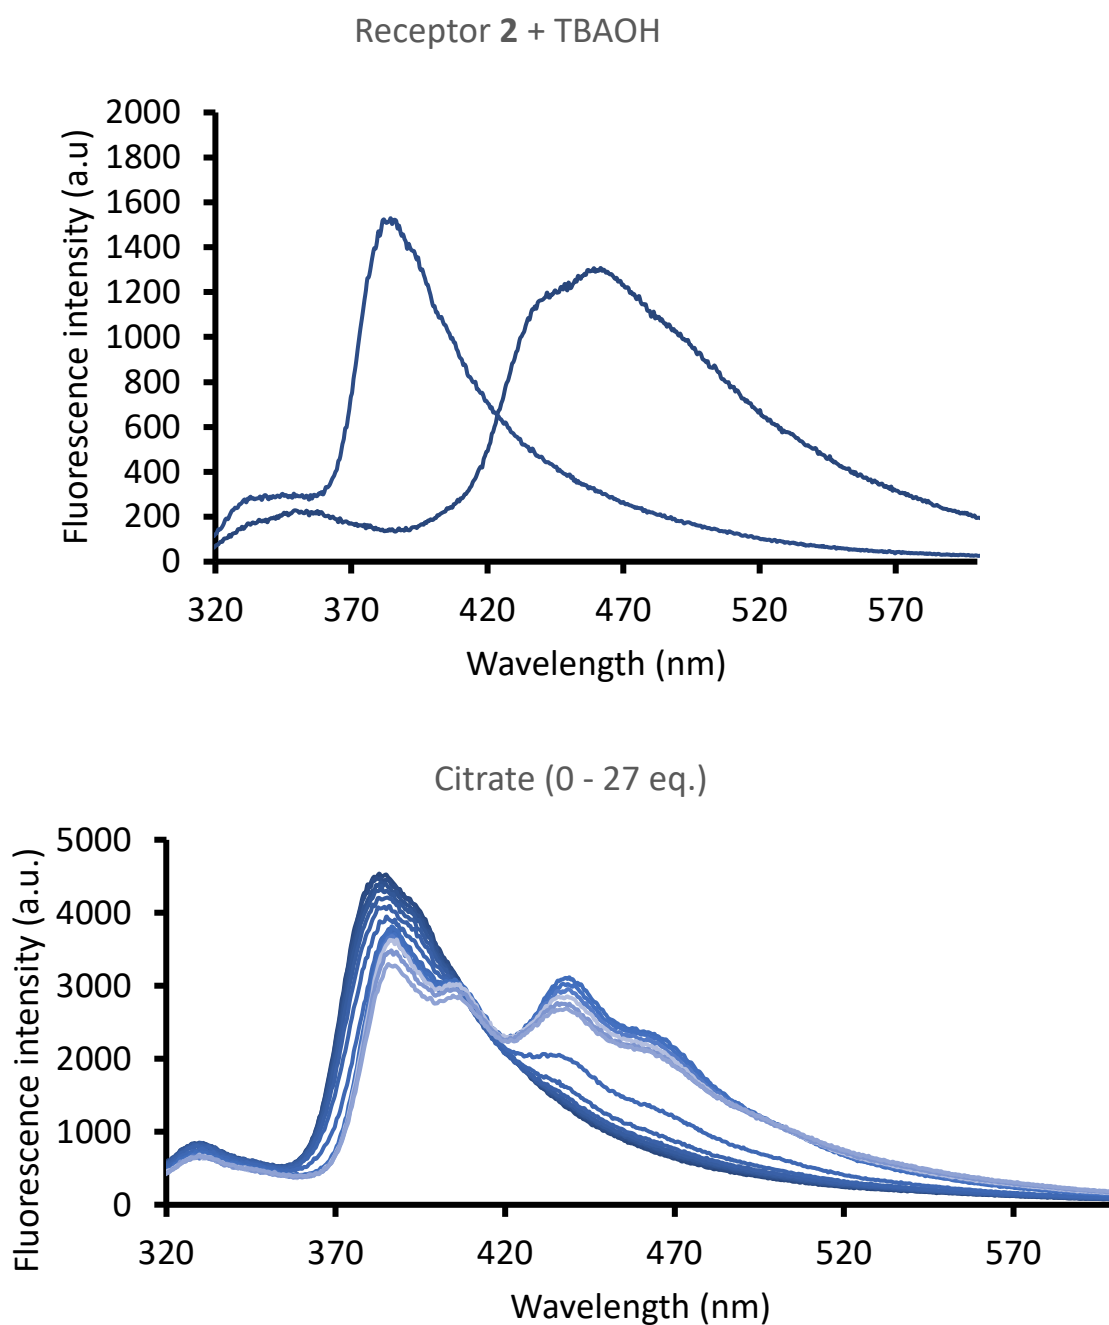

Addition of dicarboxylate species as weakly basic as tetrabutylammonium terephthalate ( $\text{pK}_a$  2.95, 5.41 in  $\text{H}_2\text{O}$ ) leads to excited state deprotonation of the receptor in DMSO solutions (data for 1%  $\text{H}_2\text{O}$  shown below).

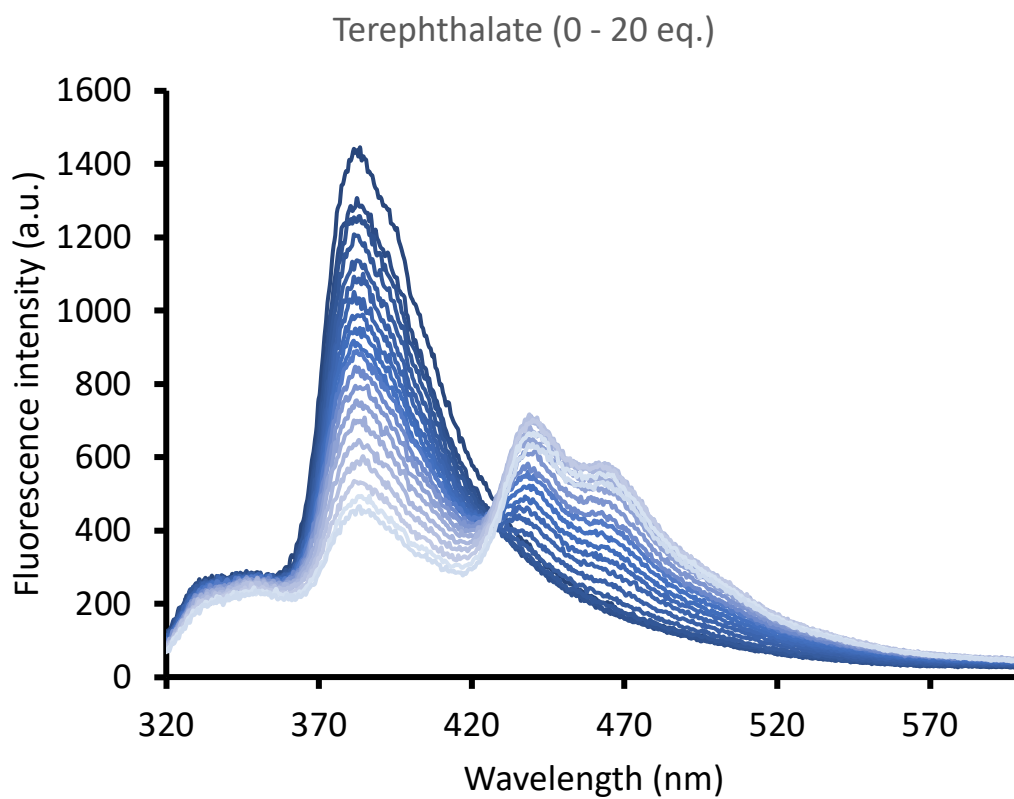

Figure S10—UV/Vis titration of receptor **2** (25  $\mu\text{M}$ ) with citrate in 9:1 DMSO/H<sub>2</sub>O

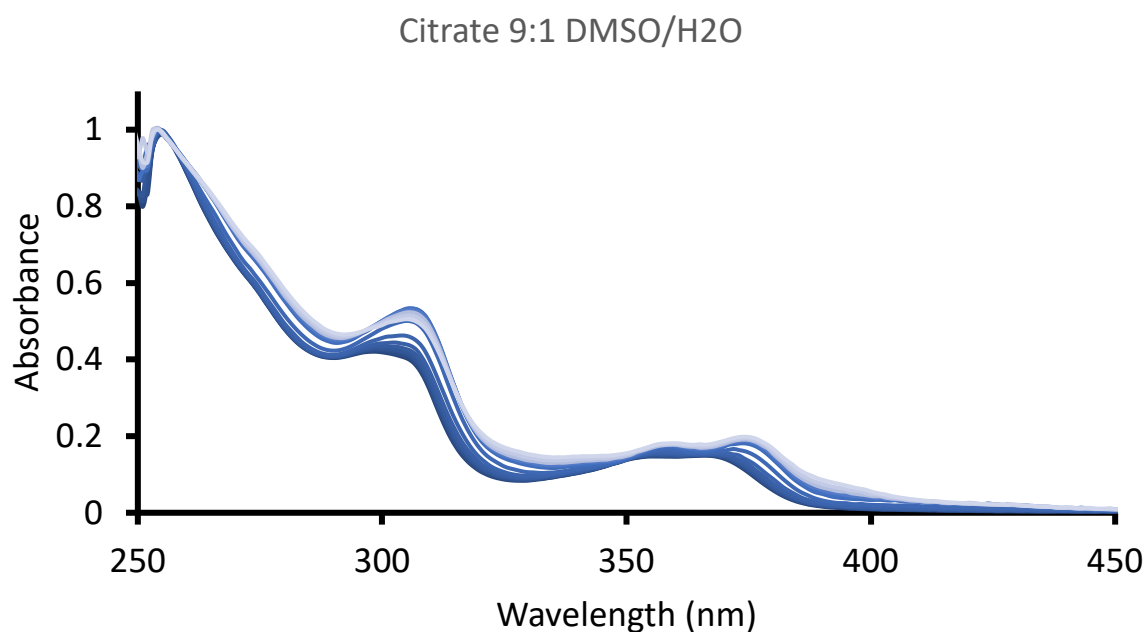

Representative data and fits to binding models of receptor **2** and citrate. Coloured dots represent data collected at 300 nm (orange) and 325 nm (yellow), and dotted lines the expected fit.

<http://app.supramolecular.org/bindfit/view/2965461d-7a8d-4bcd-8092-8d82d4e2d154>

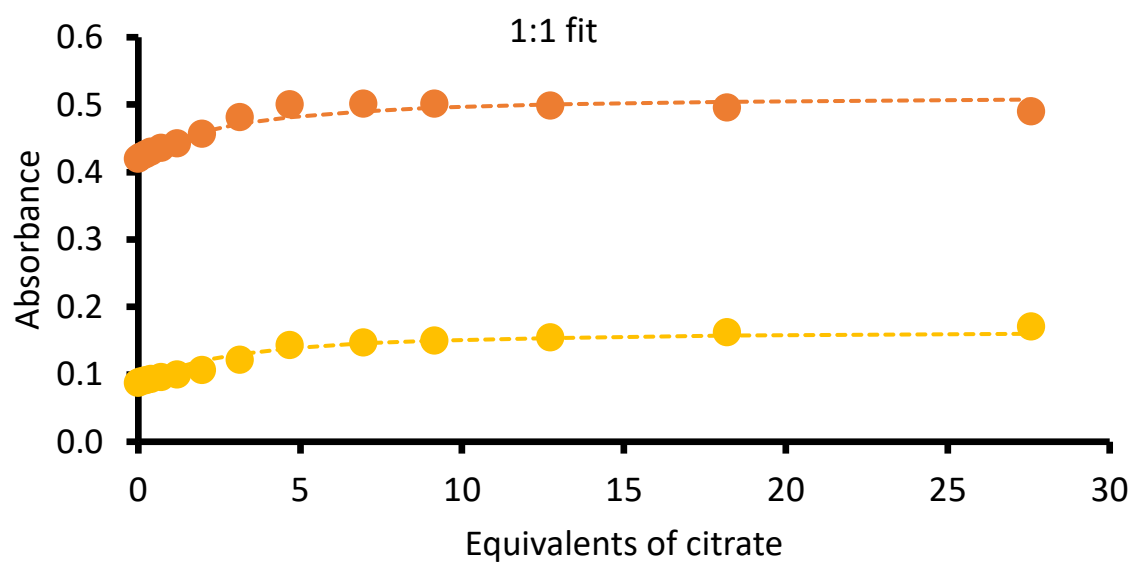

<http://app.supramolecular.org/bindfit/view/c1fd8c61-cb8c-47c6-8f88-79c9cf47a09d>

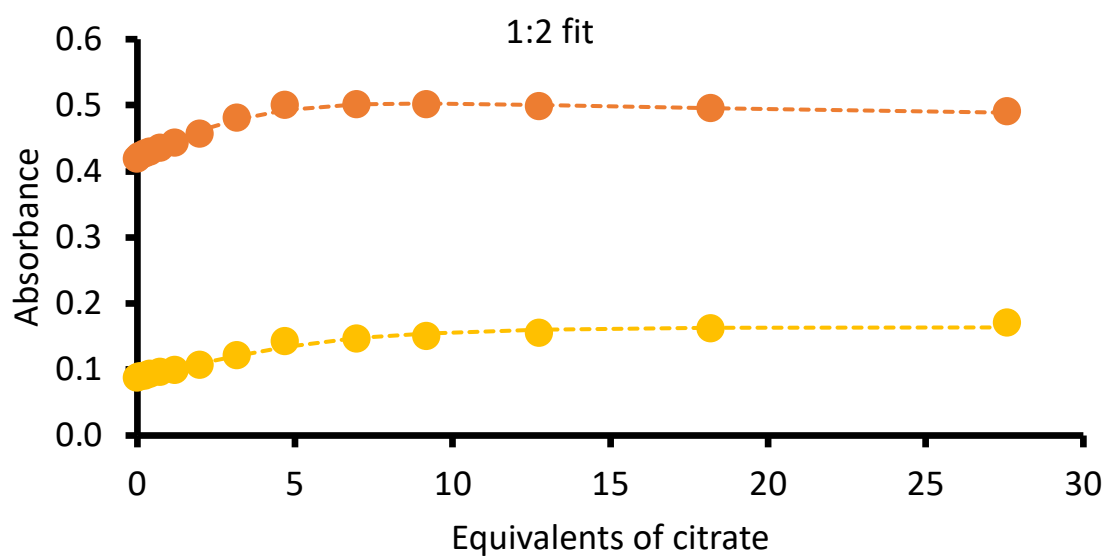

<http://app.supramolecular.org/bindfit/view/41044422-4eeb-4275-9467-ca24ee3c58b5>

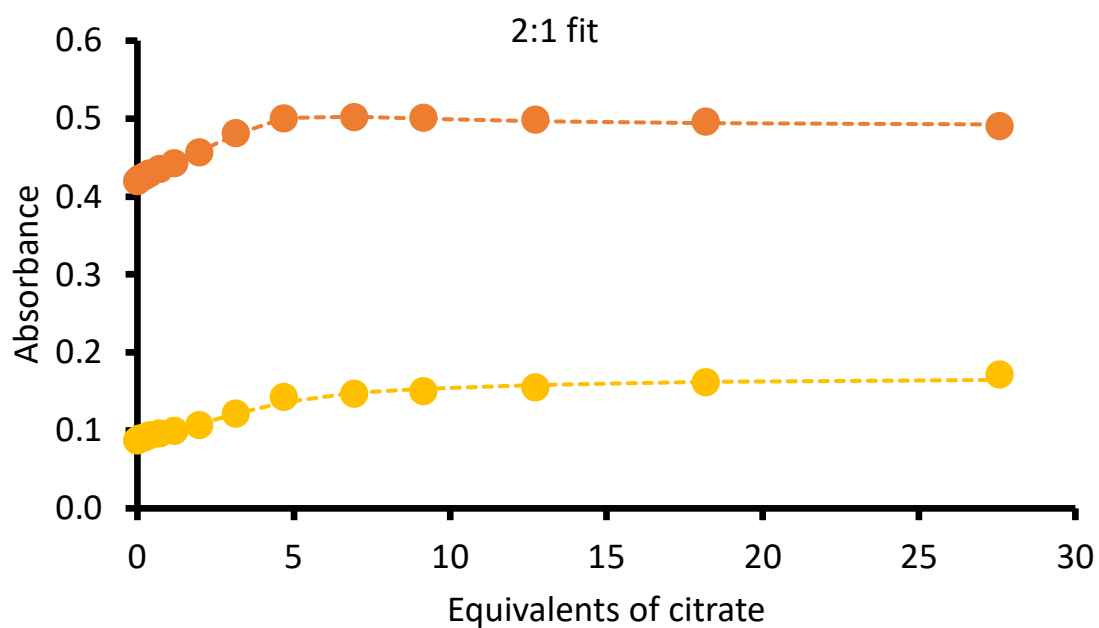

**Figure S11 – Representative UV-vis titrations of receptor 2 (25  $\mu\text{M}$ ) with carboxylates**  
**Terephthalate (DMSO + 1% H<sub>2</sub>O):  $K_{1:1} = 2.83 \times 10^4 \text{ M}^{-1}$**

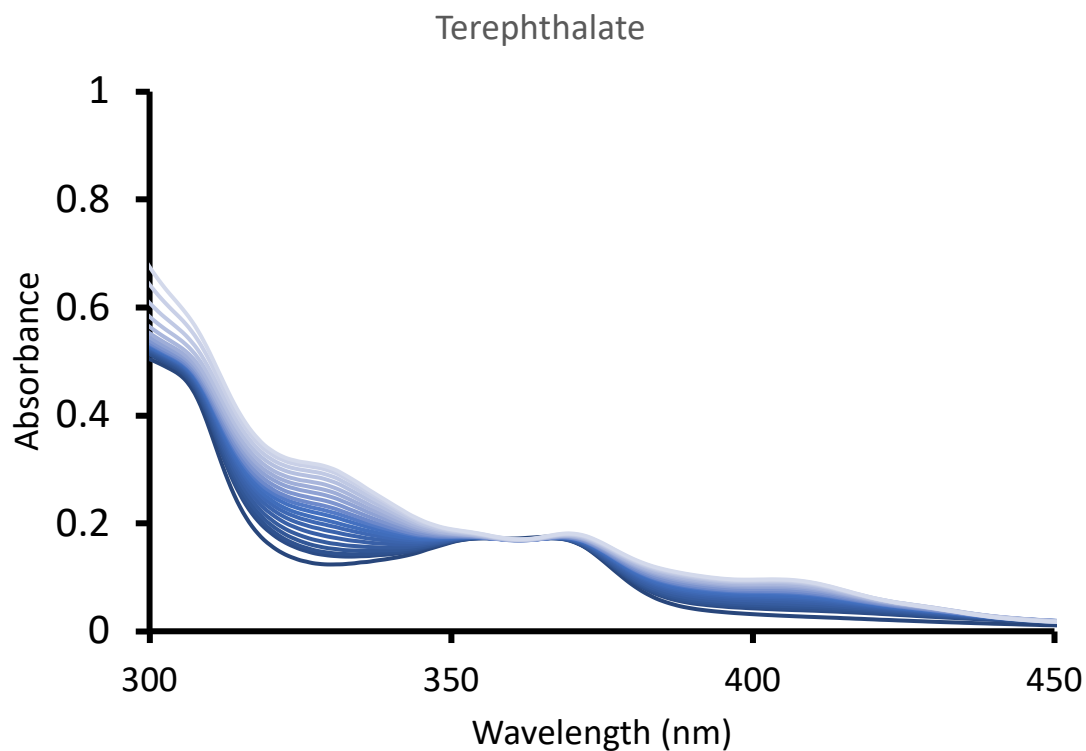

Representative data and fits to binding models of receptor 2 and terephthalate. Coloured dots represent data collected at 325 nm (orange) and 400 nm (yellow), and dotted lines the expected fit.

<http://app.supramolecular.org/bindfit/view/ffc1a891-c456-48cf-98e0-0c79875fb74a>

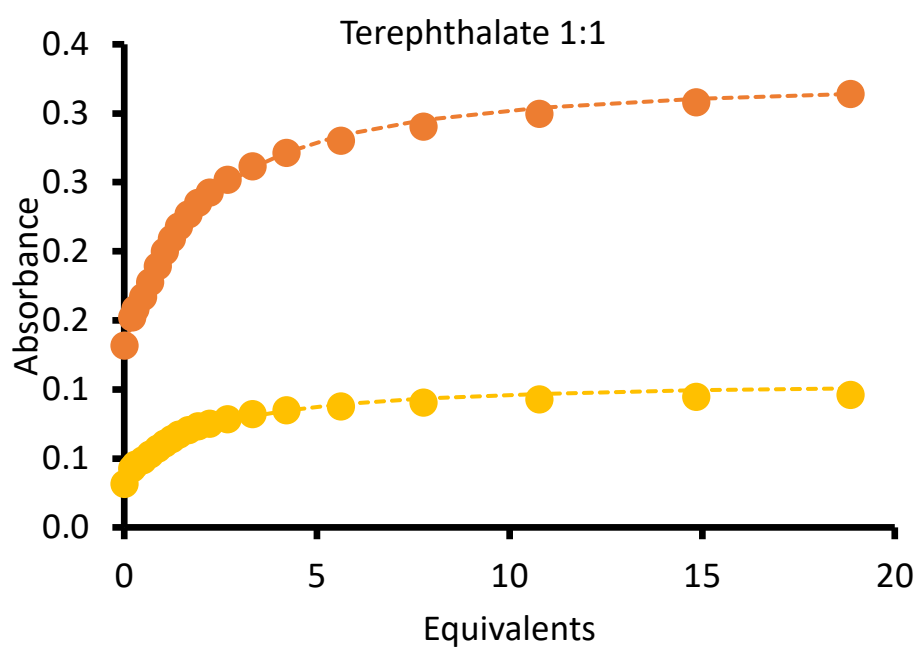

**Oxalate (DMSO + 1% H<sub>2</sub>O):**  $K_{1:1} = > 10^5 \text{ M}^{-1}$

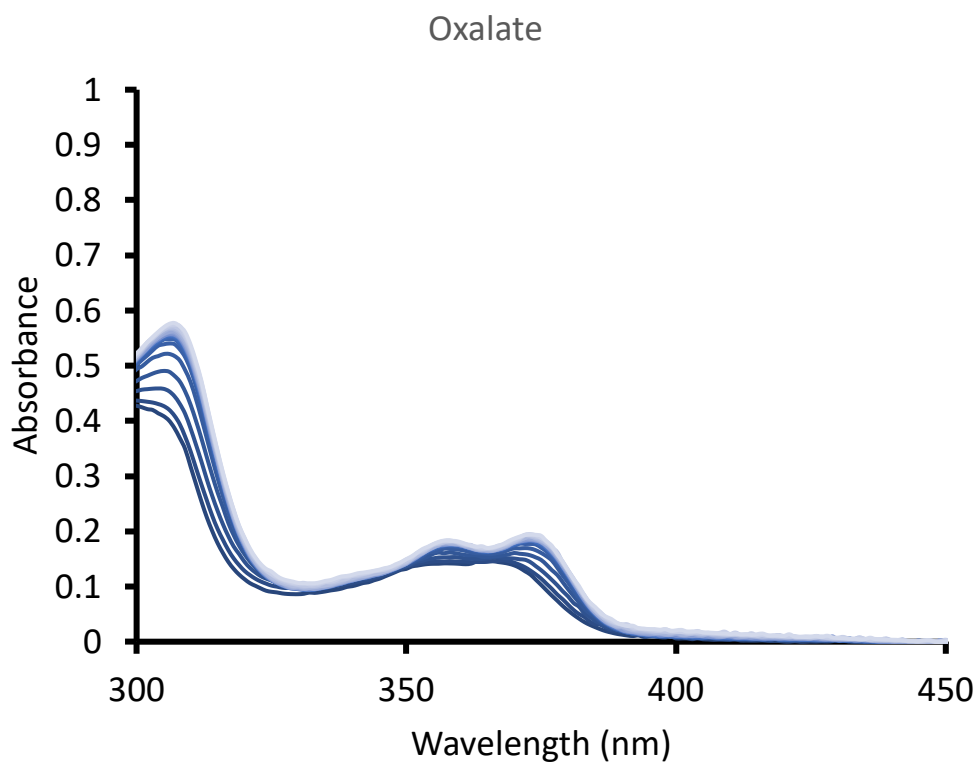

Representative data and fits to binding models of receptor **2** and oxalate. Coloured dots represent data collected at 300 nm (orange), 325 nm (yellow), and 380 nm (green) and dotted lines the expected fit.

<http://app.supramolecular.org/bindfit/view/be55d244-916e-4ae8-a5eb-02eec6b7a243>

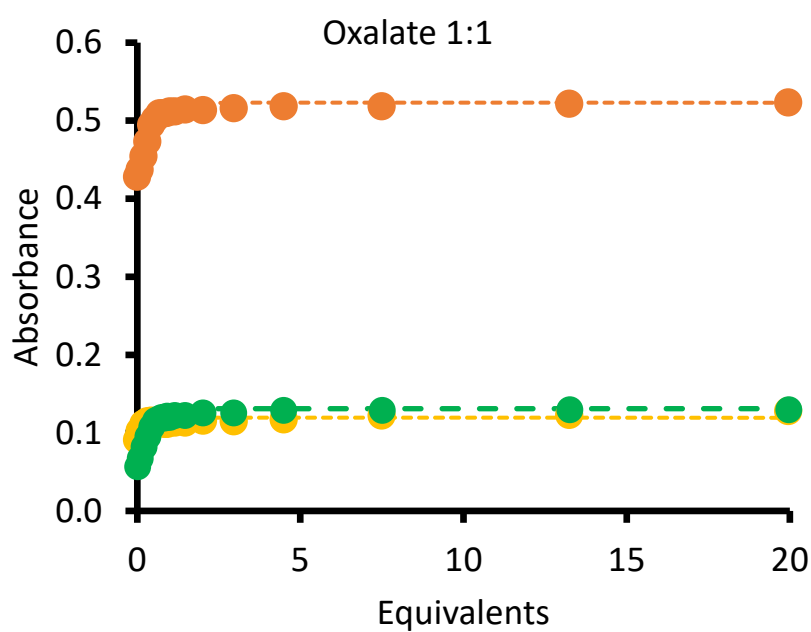

**Malonate (DMSO + 1% H<sub>2</sub>O):** Receptor displayed slow equilibration, with possible deprotonation of receptor. Plausible fits to 1:2 and 2:1 binding models ( $K_{1:1} = 4.5 \times 10^5 \text{ M}^{-1}$ ;  $K_{1:2} = 2.4 \times 10^4 \text{ M}^{-1}$  or  $K_{1:1} = 4.3 \times 10^4$ ;  $K_{2:1} = 3.4 \times 10^3$ ).

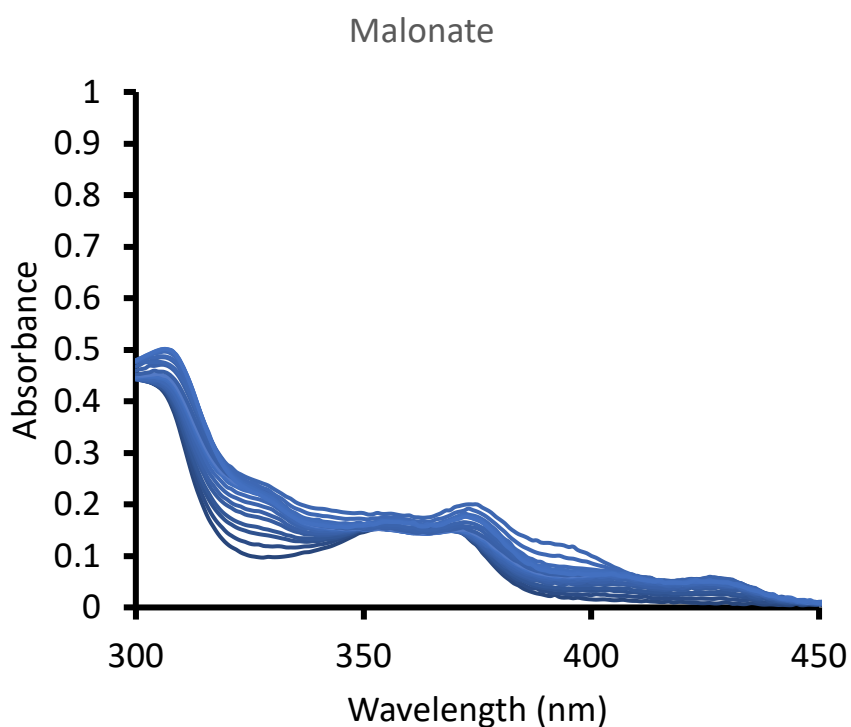

Representative data and fits to binding models of receptor **2** and malonate. Coloured dots represent data collected at 300 nm (orange), 325 nm (yellow), and 375 nm (green) and dotted lines the expected fit.

<http://app.supramolecular.org/bindfit/view/d1aa1297-59fd-4cfd-aa8d-101c3c911bfe>

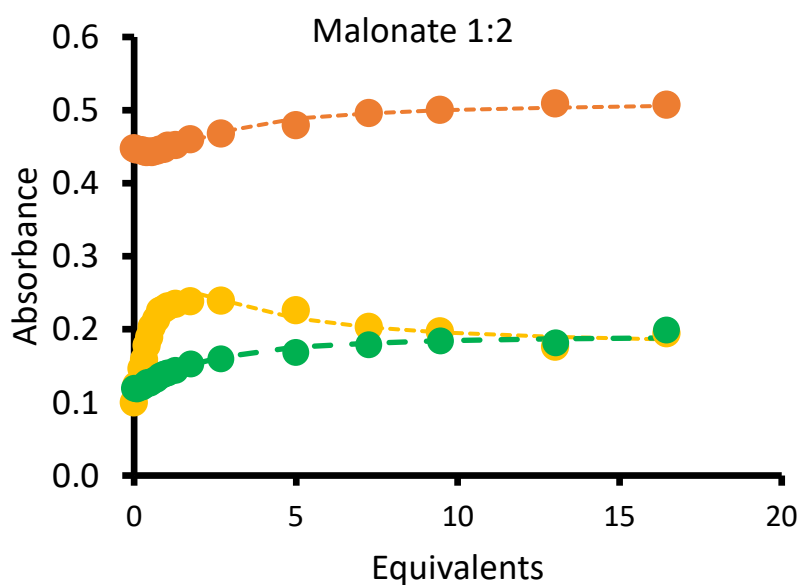

**Succinate (DMSO + 1% H<sub>2</sub>O):**  $K_{1:1} = 4.38 \times 10^4 \text{ M}^{-1}$ ;  $K_{1:2} = 2.92 \times 10^4 \text{ M}^{-1}$

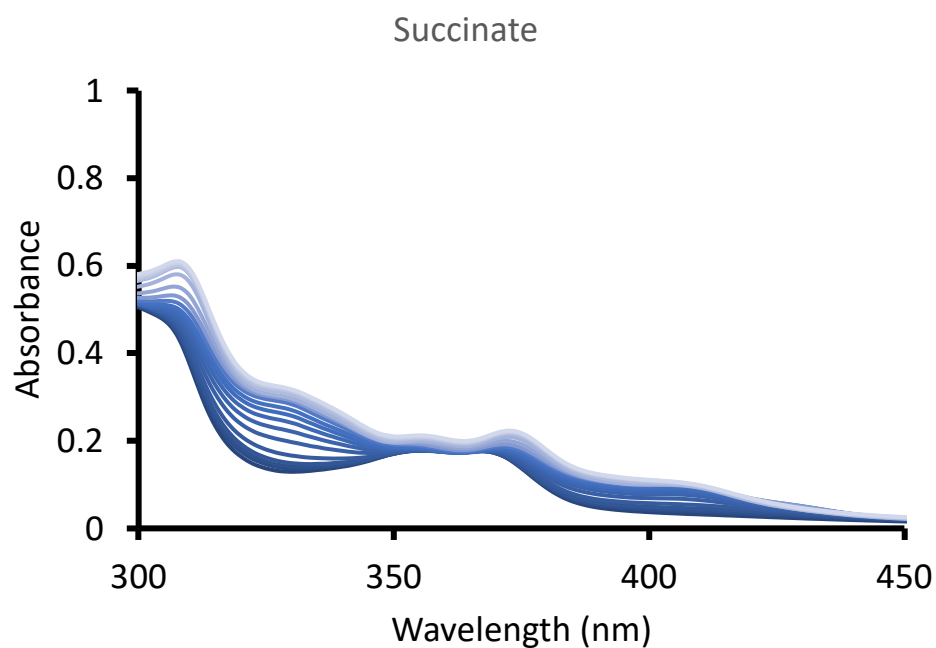

Representative data and fits to binding models of receptor **2** and succinate. Coloured dots represent data collected at 325 nm (orange) and 400 nm (yellow) and dotted lines the expected fit.

<http://app.supramolecular.org/bindfit/view/aa8e45e9-eeef-443a-90e3-5dbbcea1ac40>

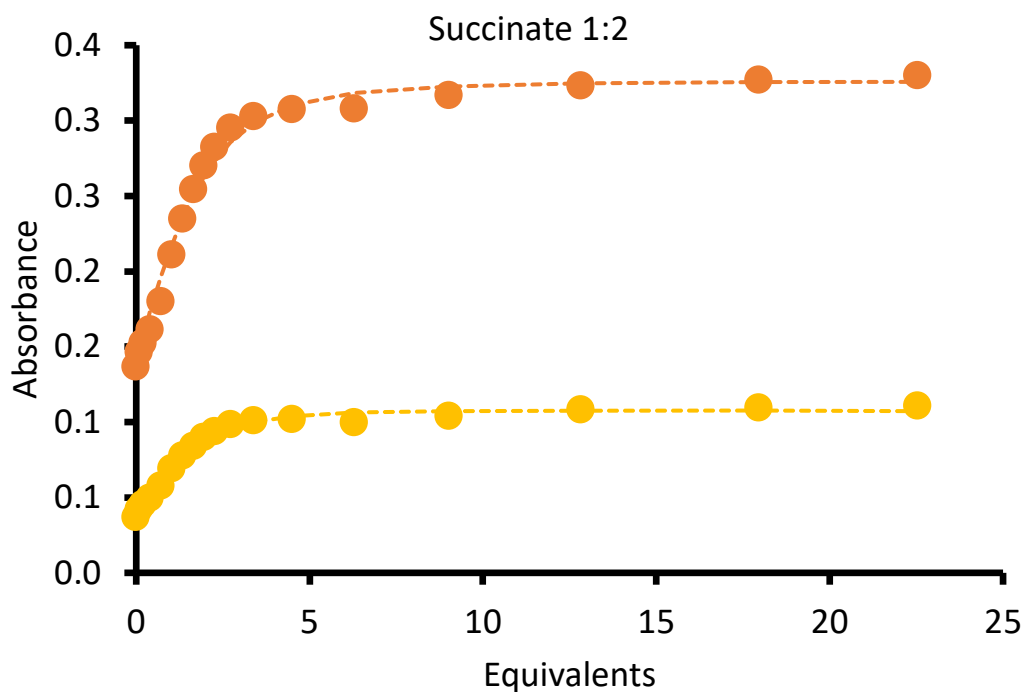

**Glutarate (DMSO + 1% H<sub>2</sub>O):**  $K_{1:1} = 1.4 \times 10^5 \text{ M}^{-1}$ ;  $K_{1:2} = 3.3 \times 10^3 \text{ M}^{-1}$

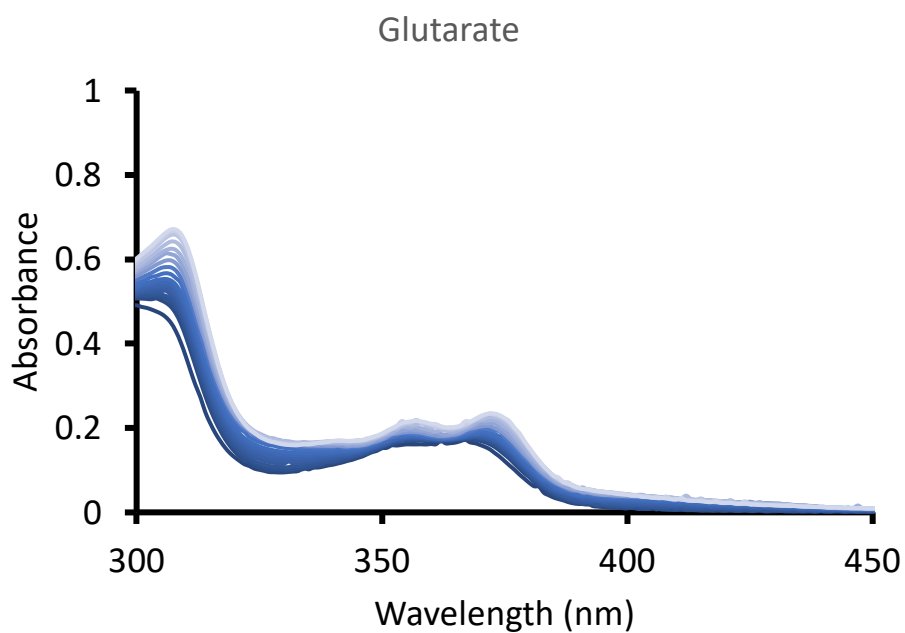

Representative data and fits to binding models of receptor **2** and glutarate. Coloured dots represent data collected at 325 nm (orange) and 400 nm (yellow) and dotted lines the expected fit.

<http://app.supramolecular.org/bindfit/view/b9a5a7ce-dfa8-4428-8fbe-1fea490031b2>

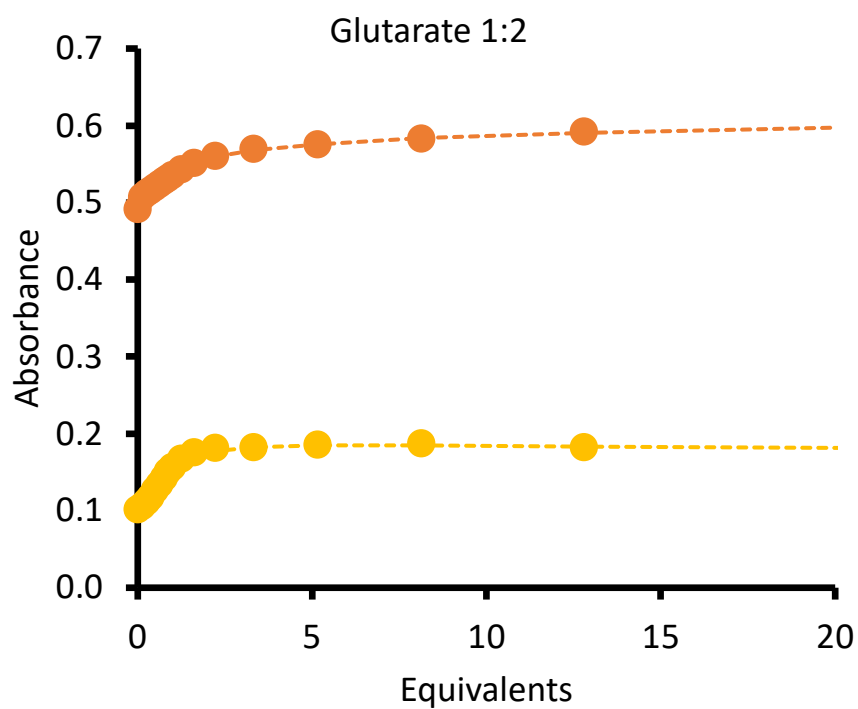

**Adipate (DMSO + 1% H<sub>2</sub>O):**  $K_{1:1} > 10^5 \text{ M}^{-1}$

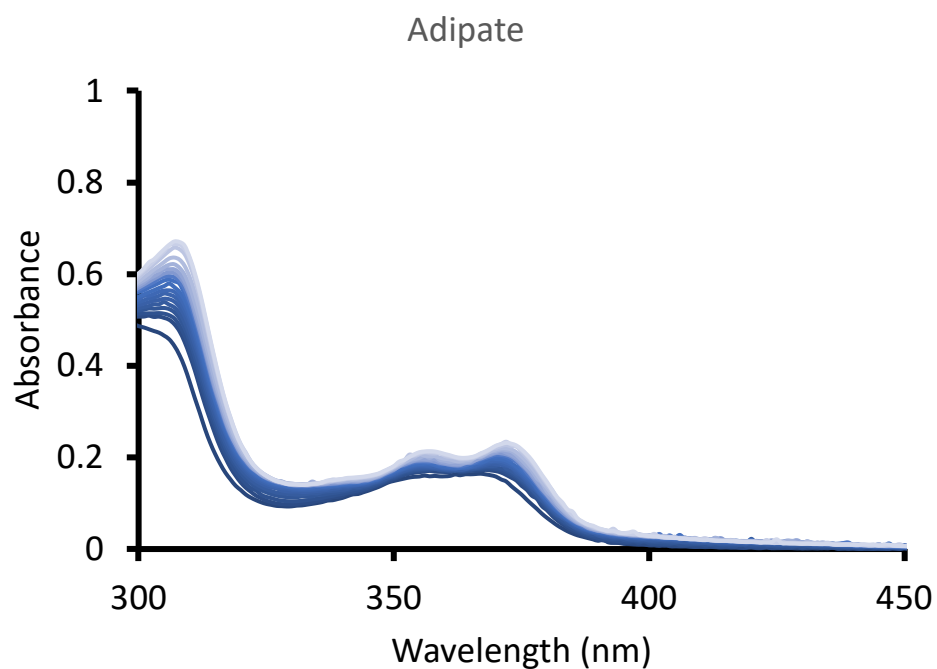

Representative data and fits to binding models of receptor **2** and adipate. Coloured dots represent data collected at 300 nm (orange) and 325 nm (yellow) and dotted lines the expected fit.

<http://app.supramolecular.org/bindfit/view/e8ec5eb8-67fb-4725-8493-d97a8319cae7>

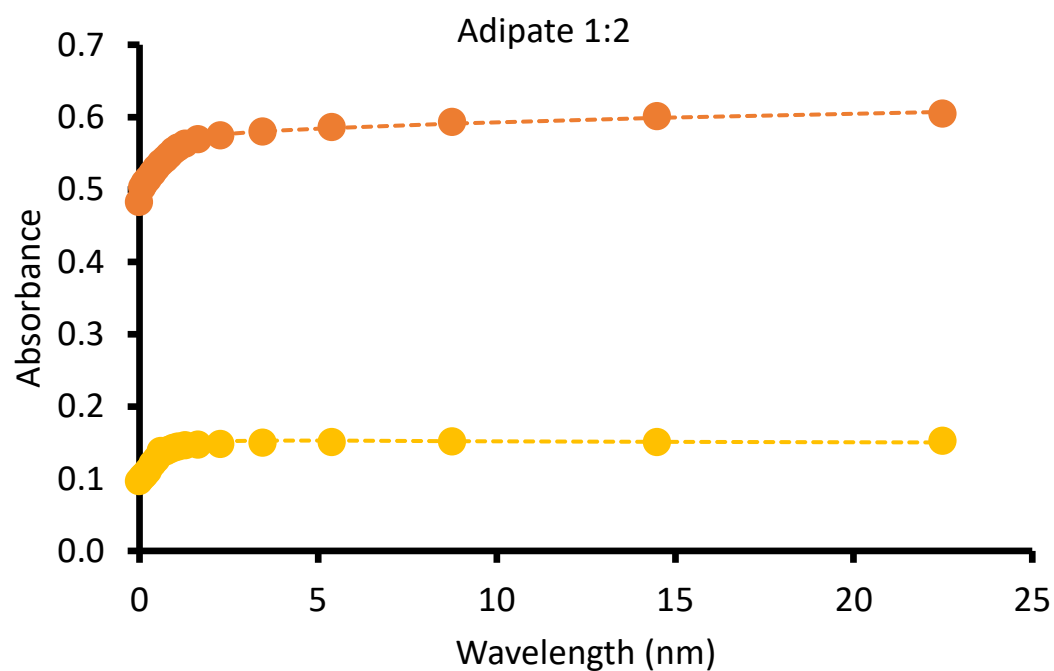

**Benzoate (DMSO + 1% H<sub>2</sub>O):**

Negligible changes in absorbance—data could not be fit to any binding model.

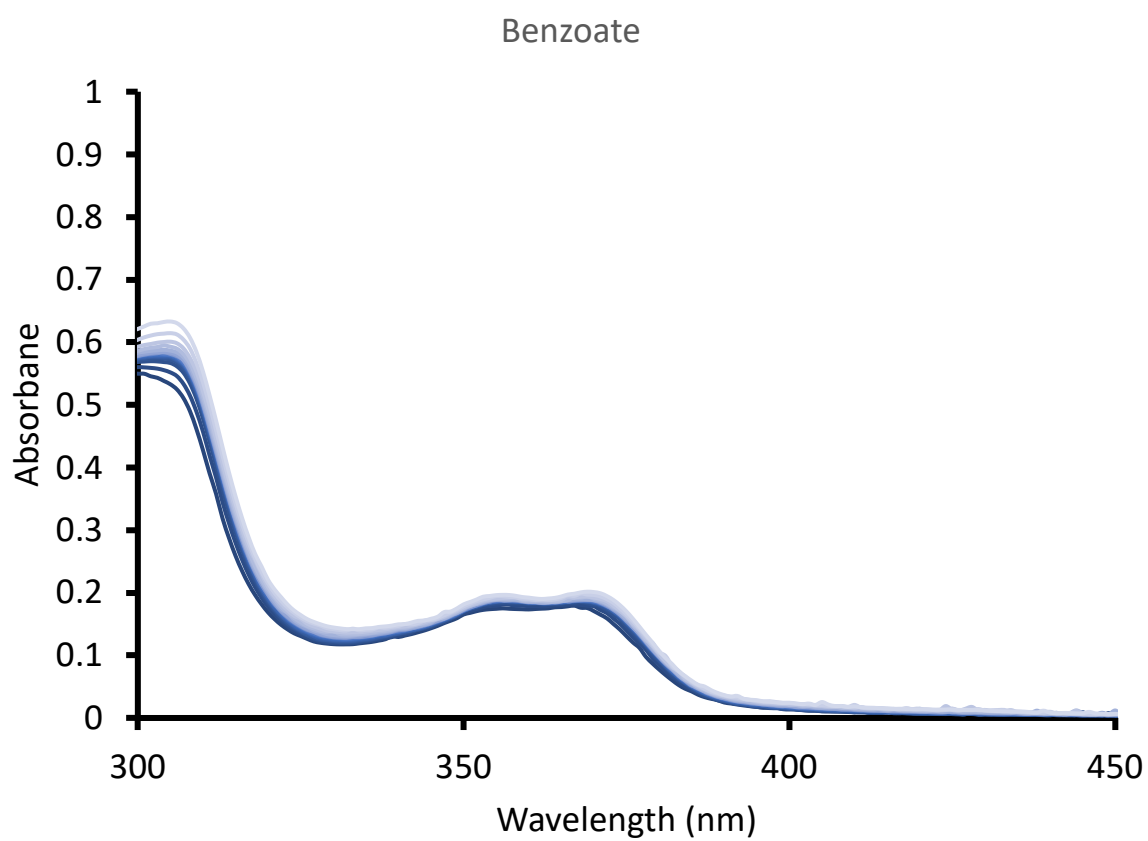

Figure S12—Spectral Signature of Receptor 2

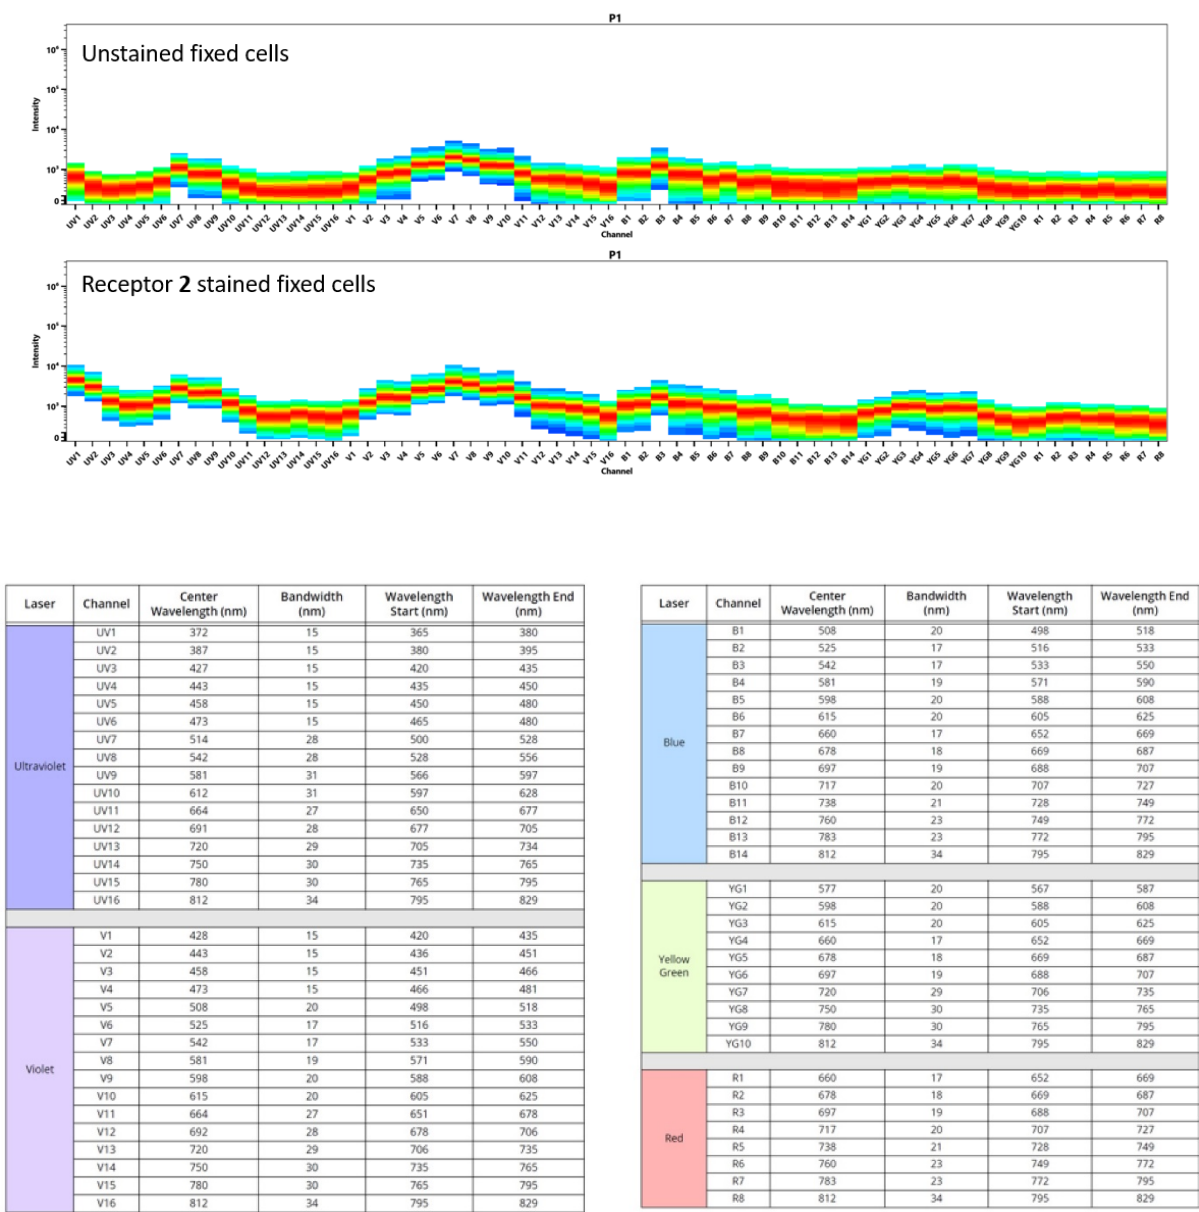

Spectral signature of fixed cells in the absence and presence of receptor **2** (50  $\mu$ M). An increase in fluorescence intensity was observed for the UV1-UV3 channels (372 – 435 nm) when receptor **2** was present.

1. Berry, S. N.; Qin, L.; Lewis, W.; Jolliffe, K. A., Conformationally adaptable macrocyclic receptors for ditopic anions: analysis of chelate cooperativity in aqueous containing media. *Chemical Science* **2020**, *11*, 7015 - 7022.
2. Smith, J.; Liras, J. L.; Schneider, S. E.; Anslyn, E. V., Solid and Solution Phase Organic Syntheses of Oligomeric Thioureas. *The Journal of Organic Chemistry* **1996**, *61* (25), 8811-8818.
3. Gross, R.; Dürner, G.; Göbel, M. W., Beschleunigung von Substitutionsreaktionen eines Phosphorsäurediesters durch Bis(guanidinium)-Verbindungen. *Liebigs Ann. Chem.* **1994**, *1994* (1), 49-58.
